# Supplementary material for: Seismic monitoring of urban activity in Barcelona during COVID-19 lockdown
Source: Copernicus journal article supplement (doi:10.5194/se-2020-190), 2020-11-27

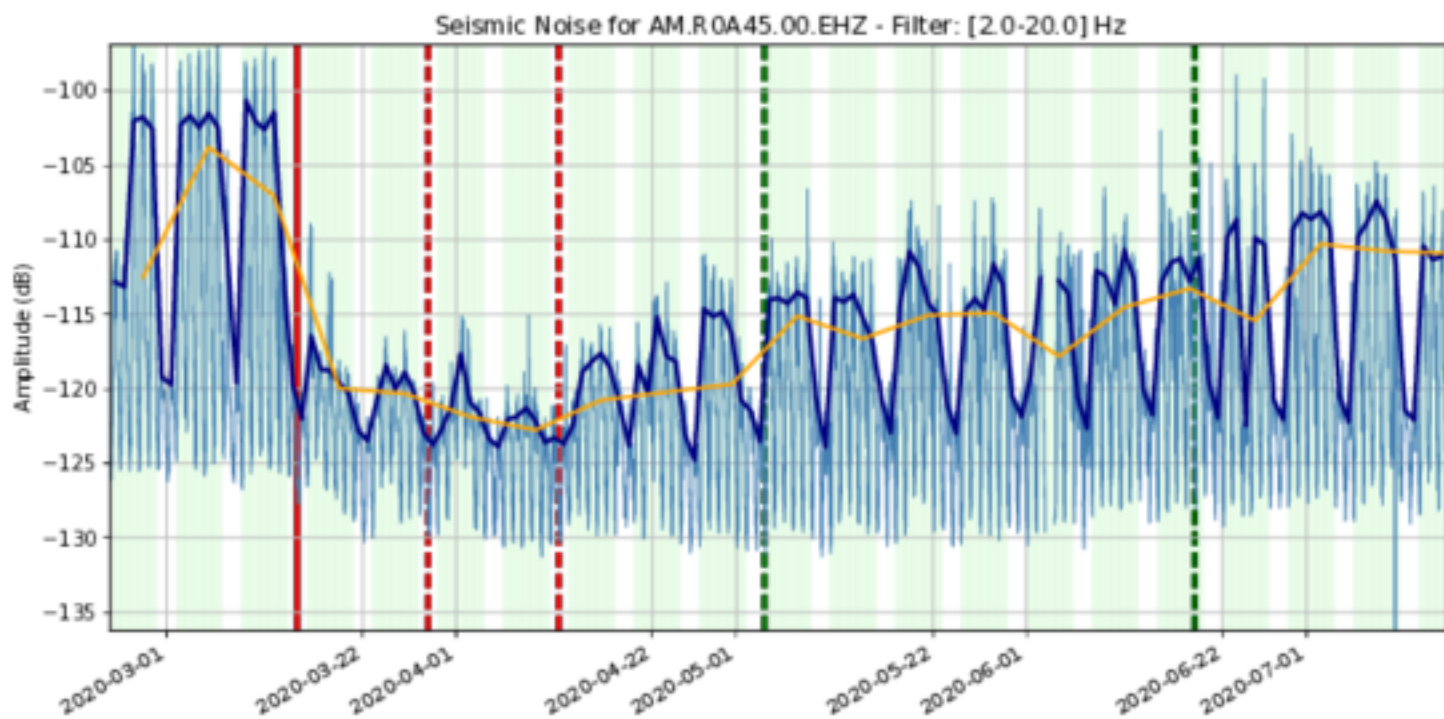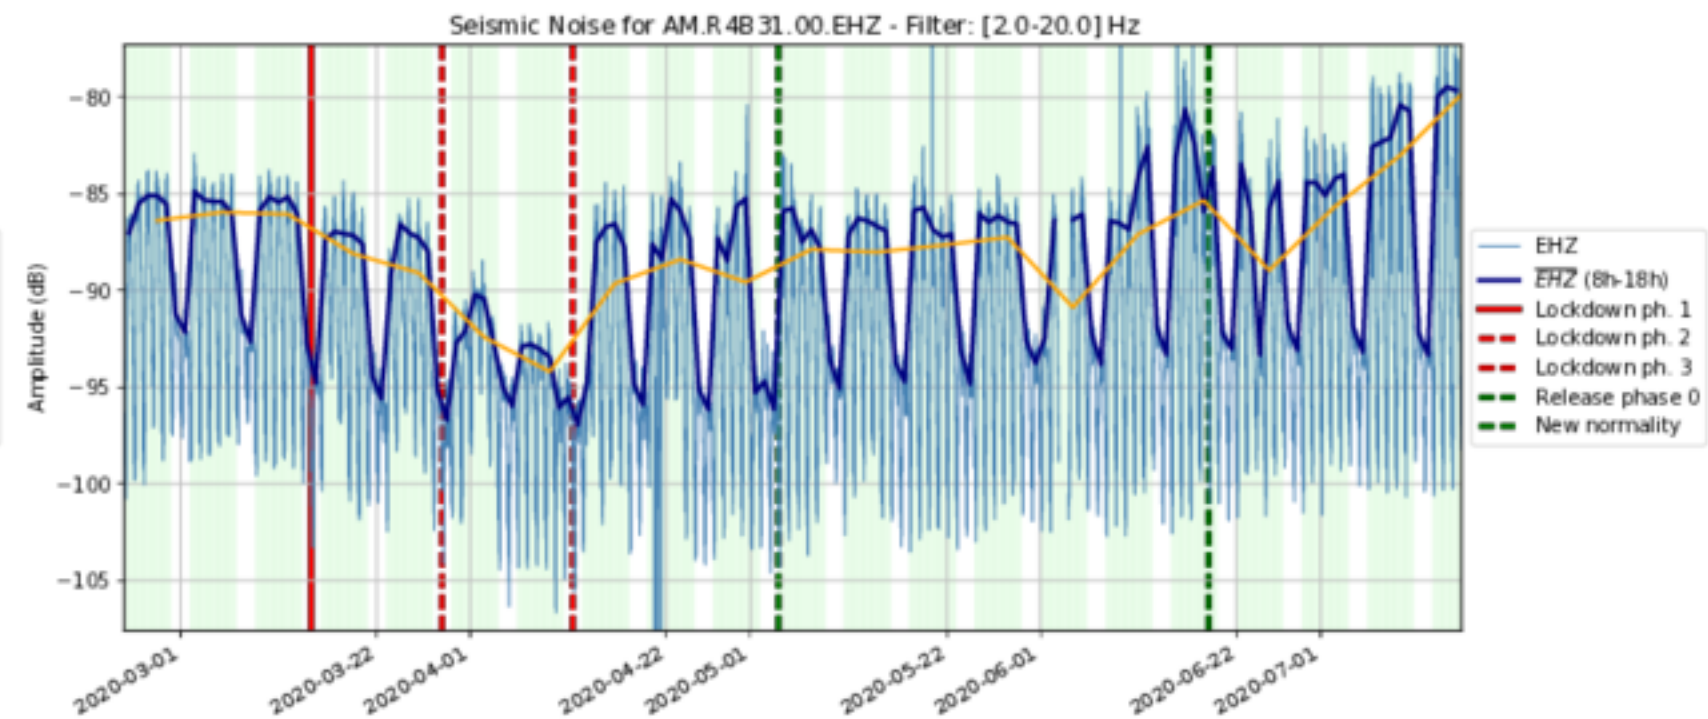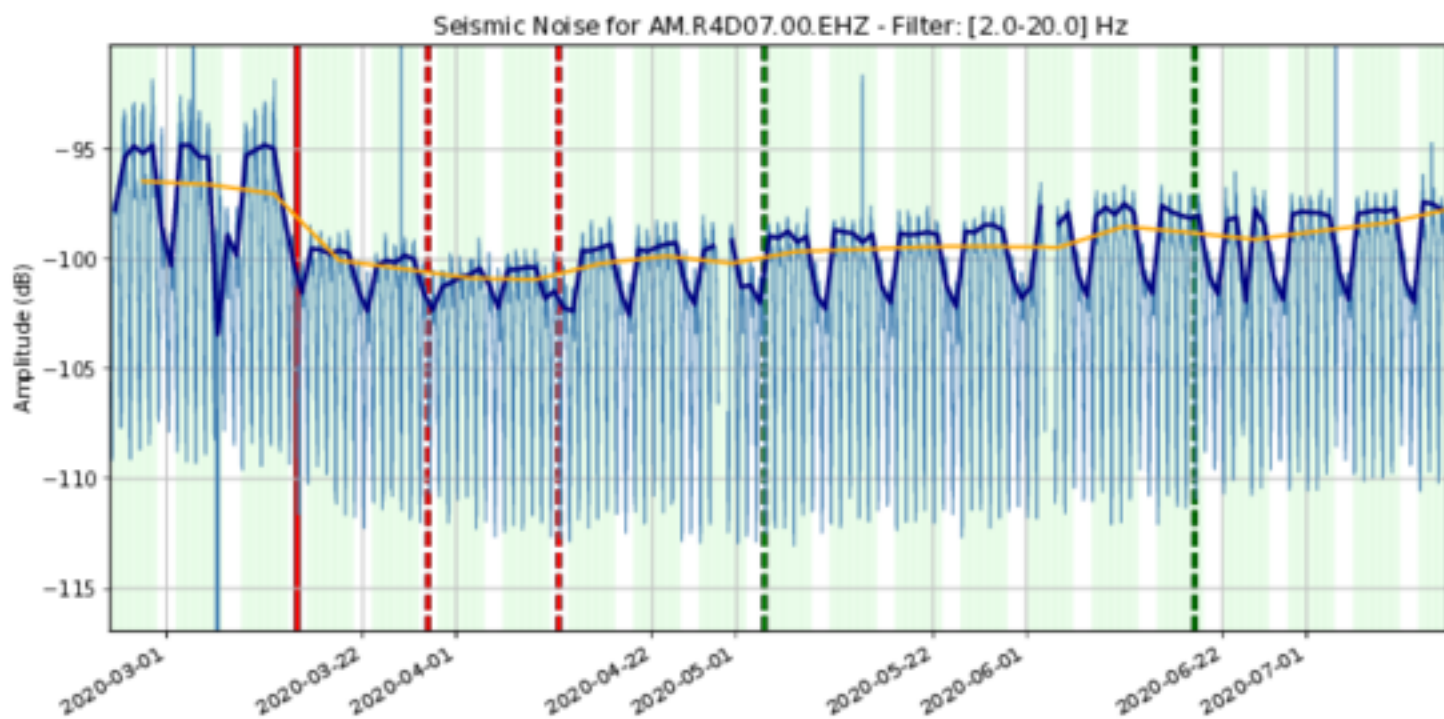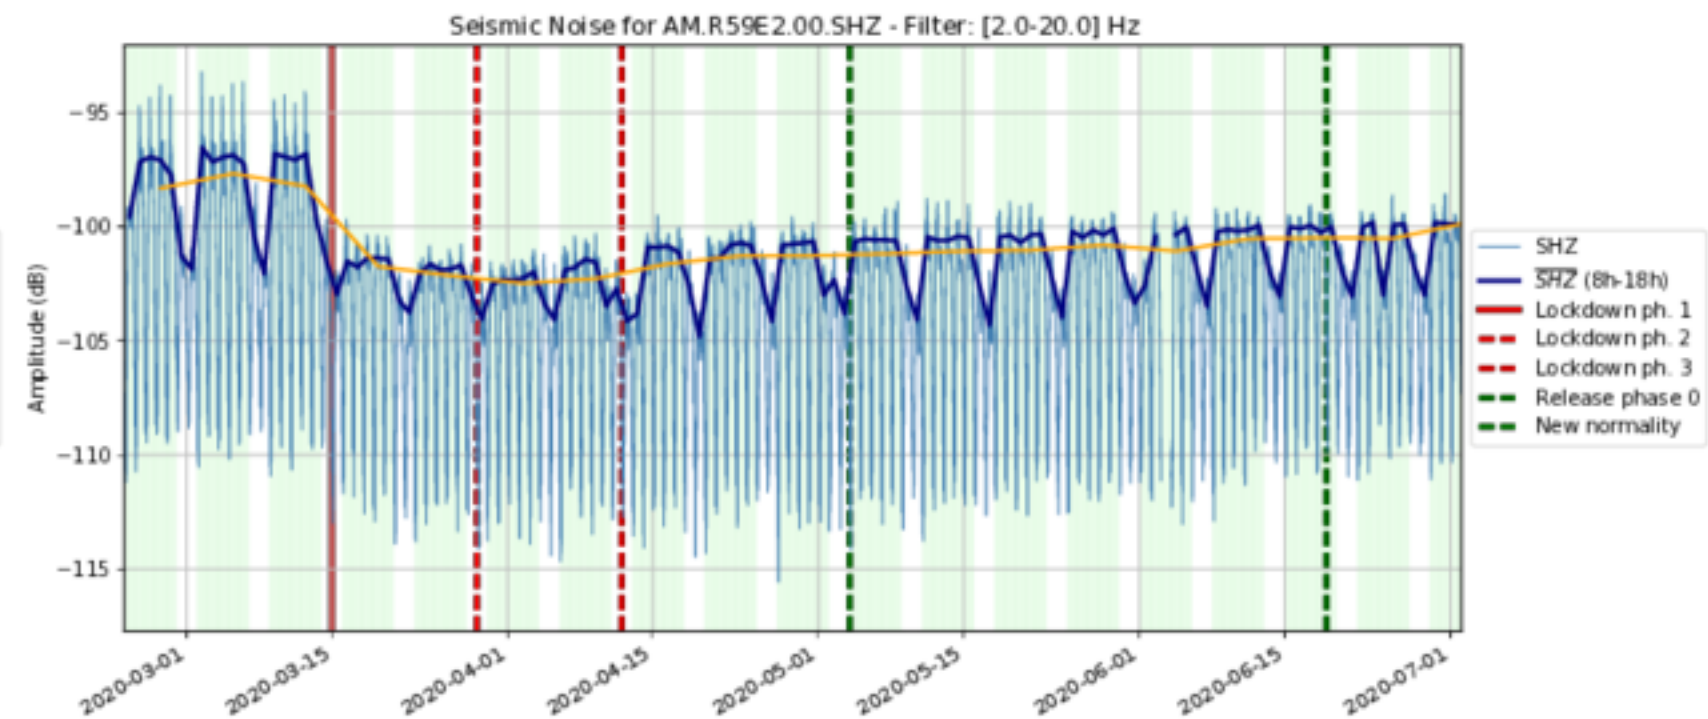

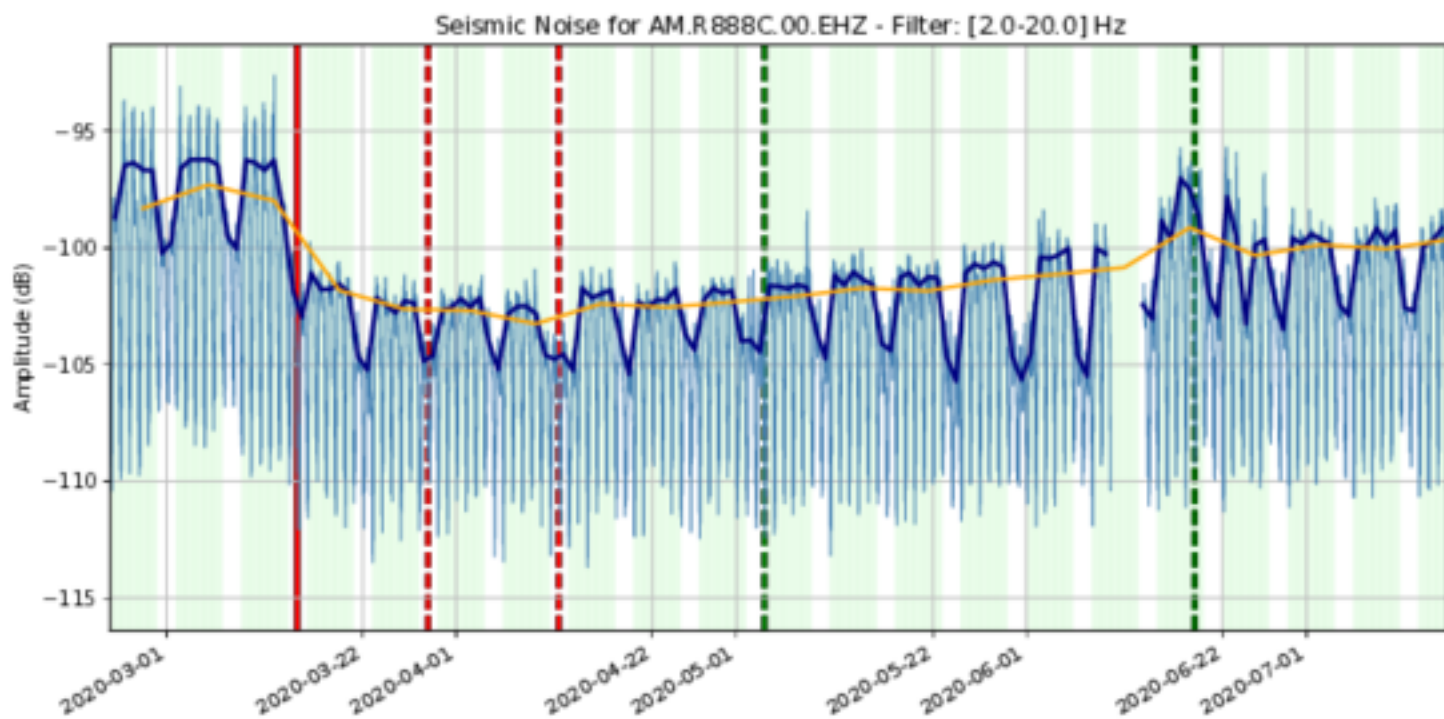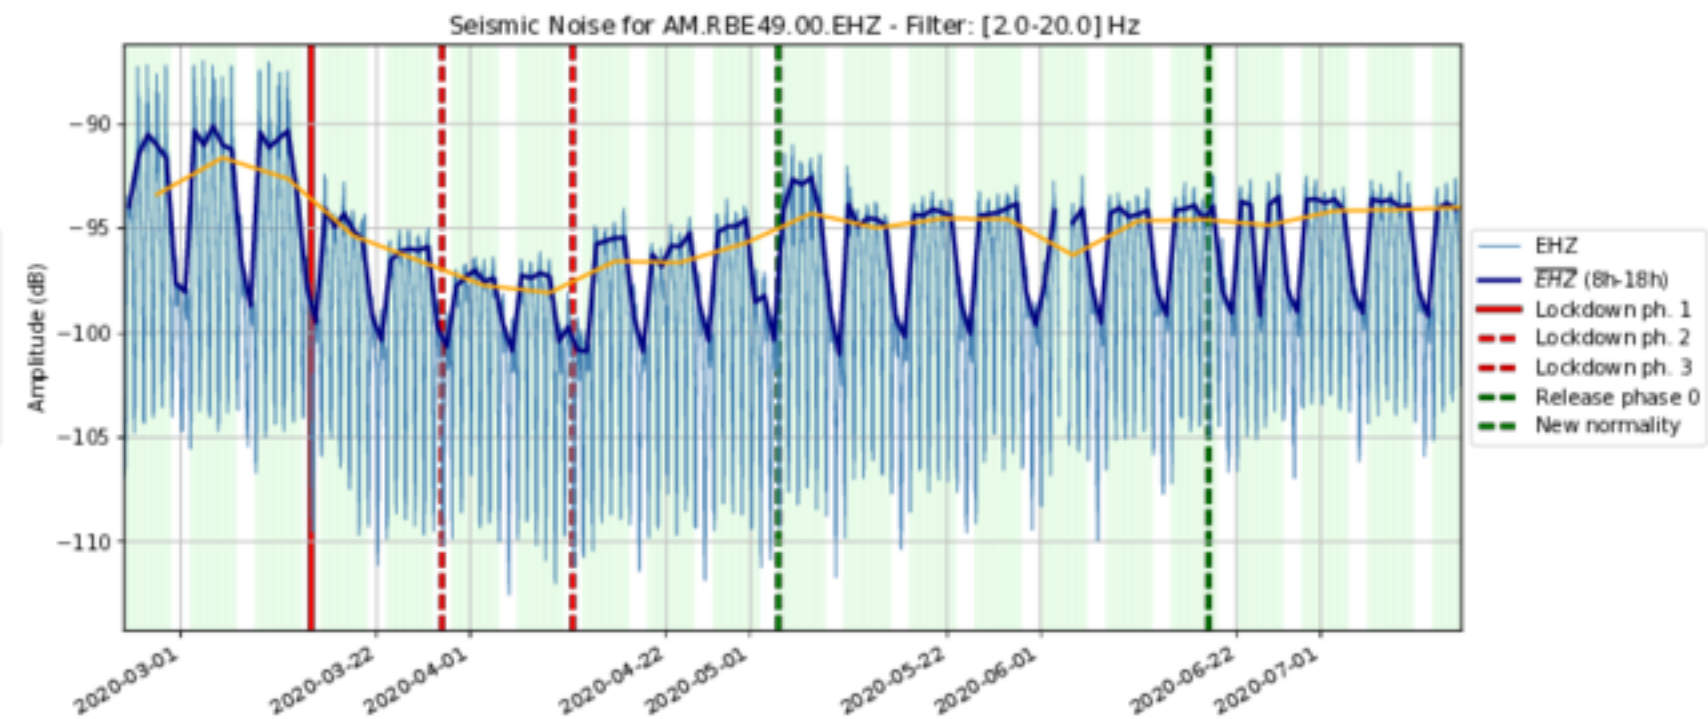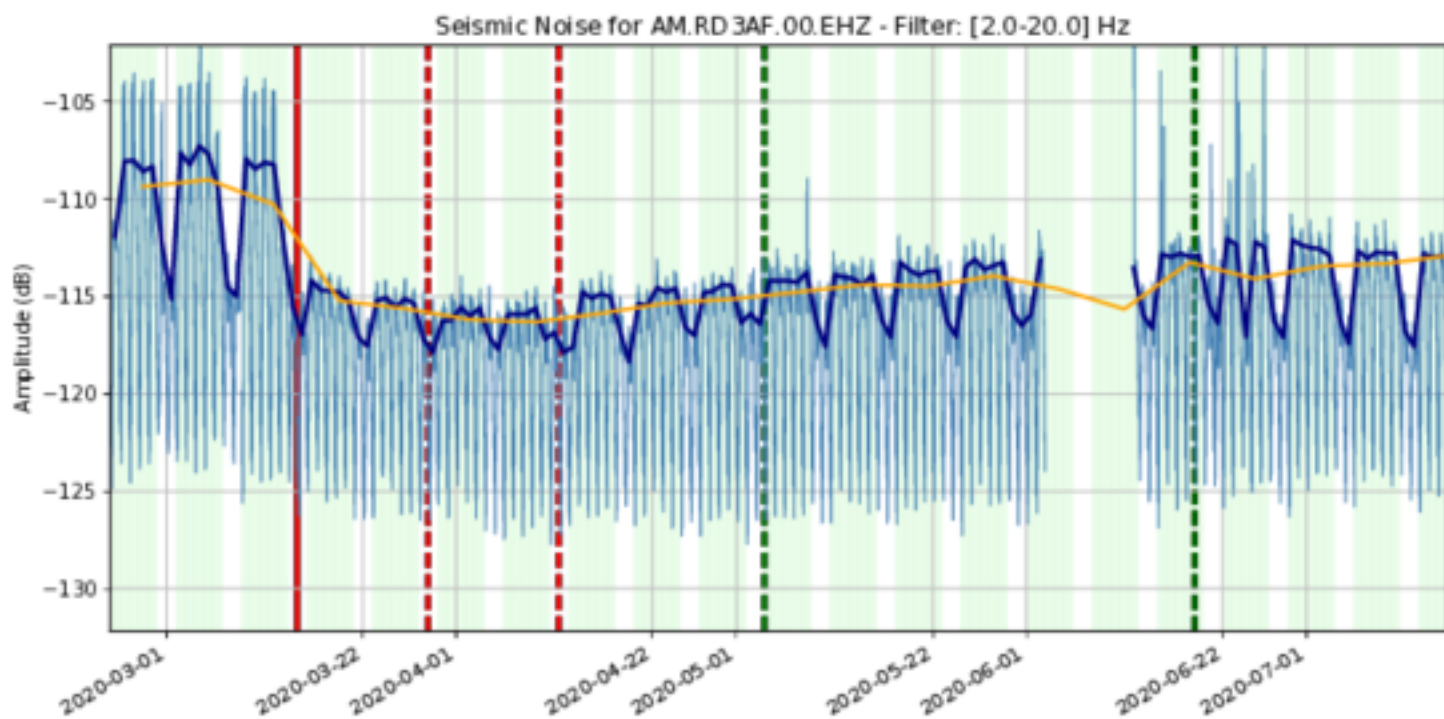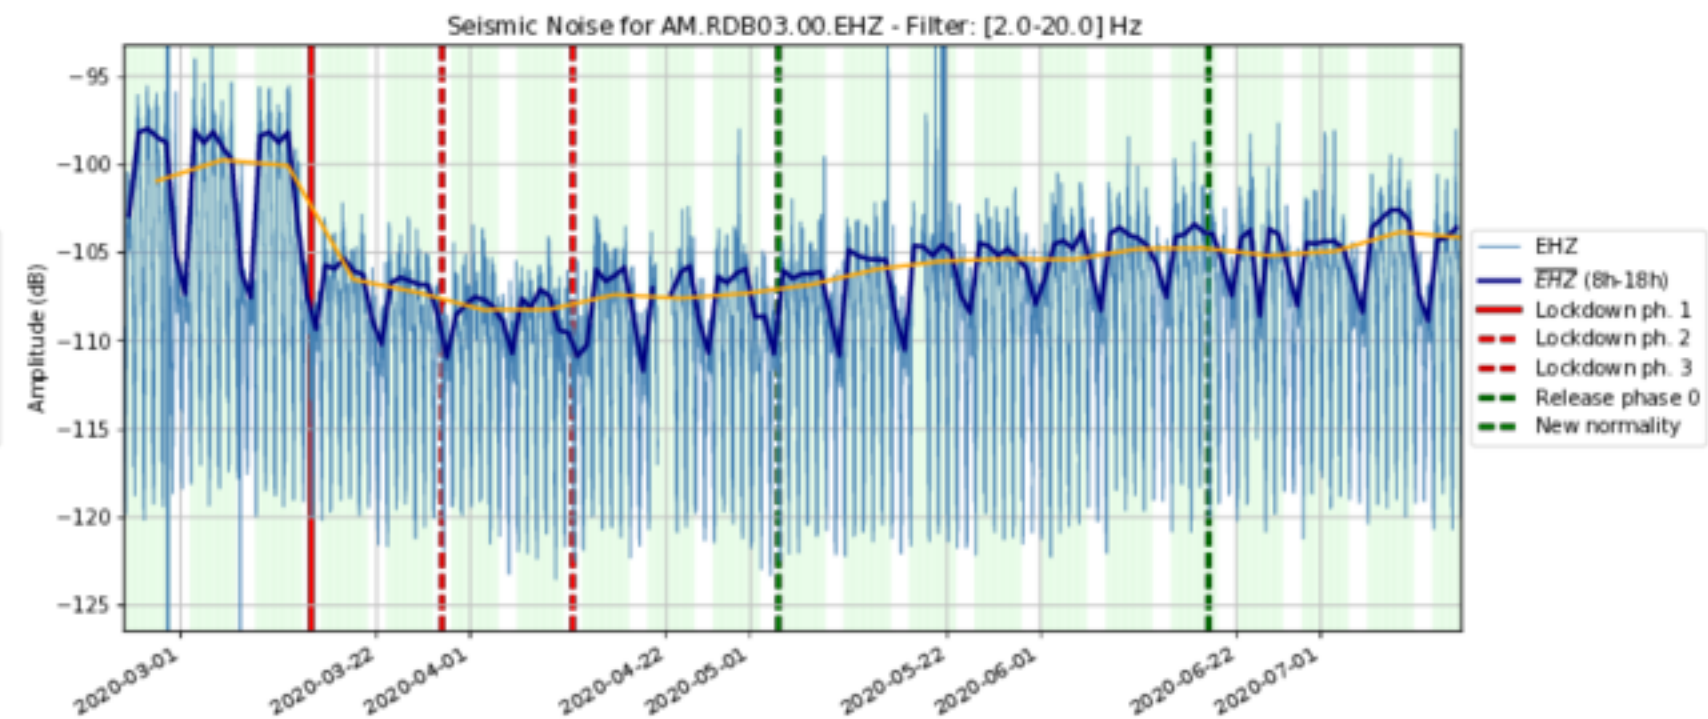



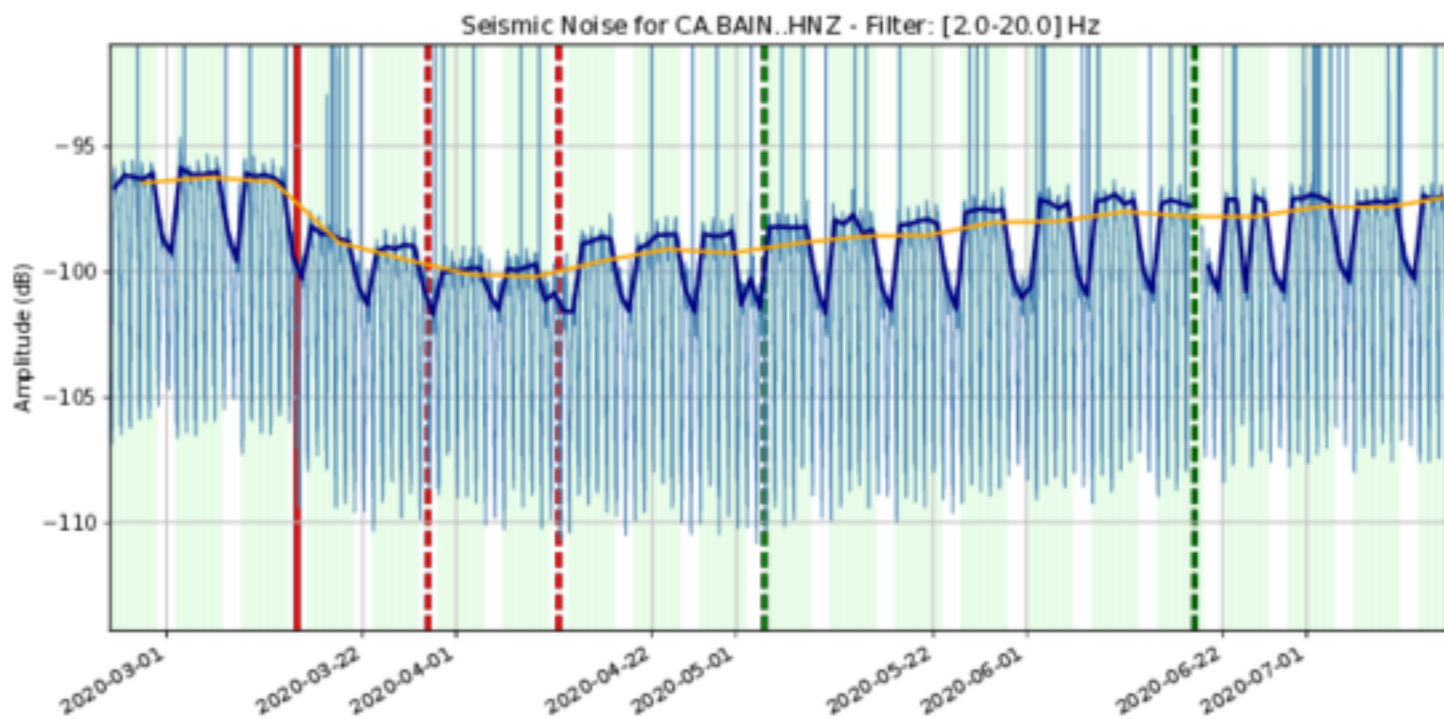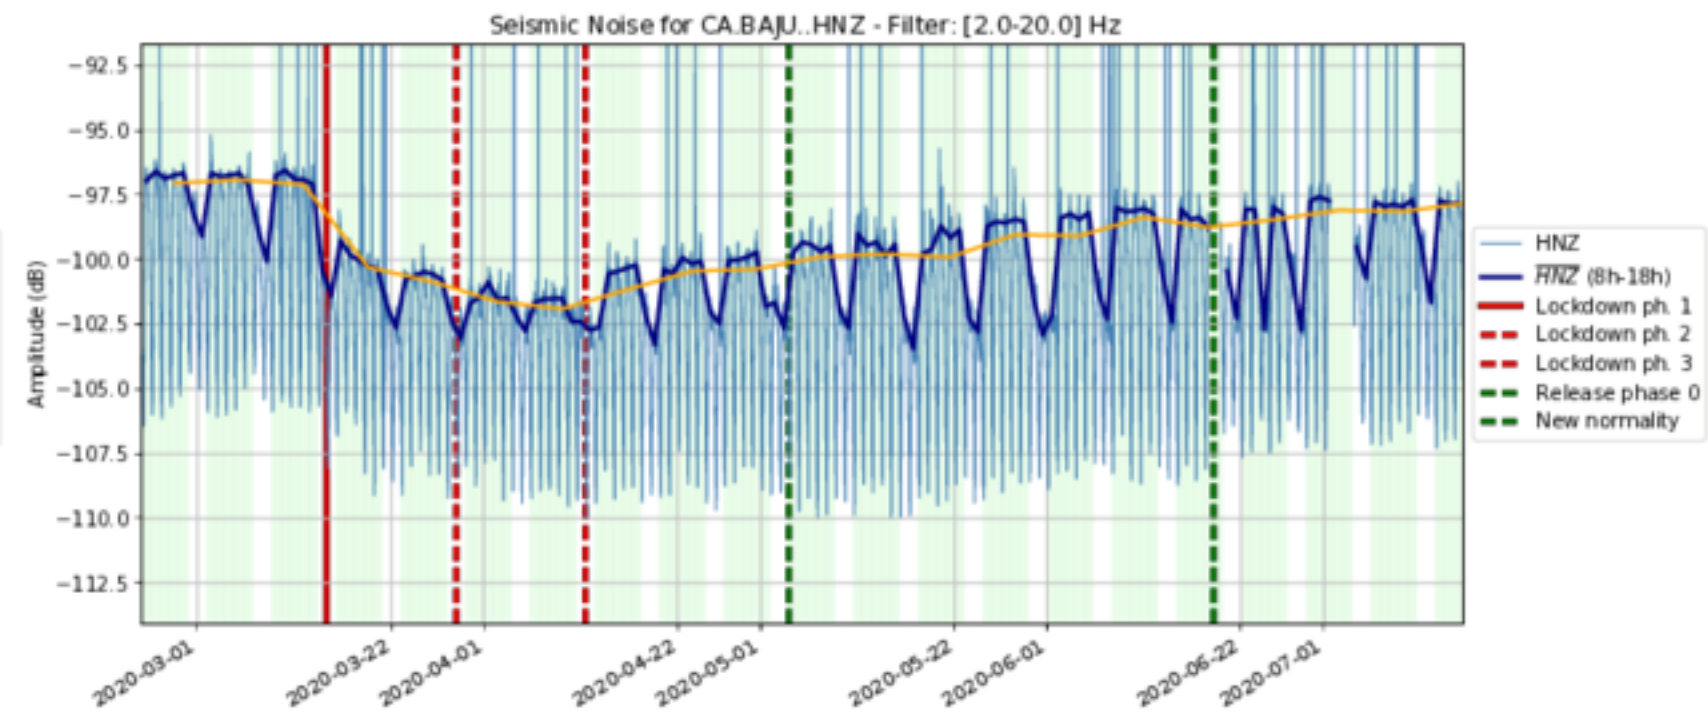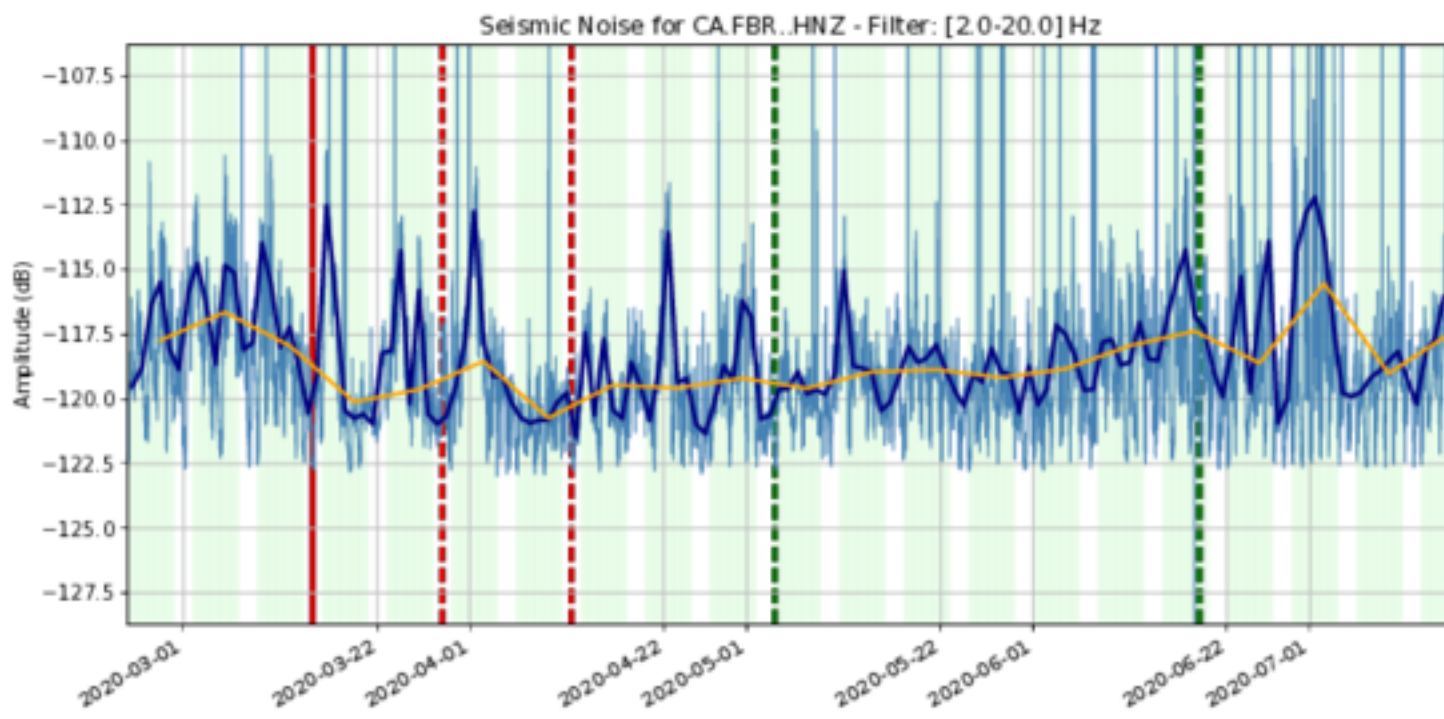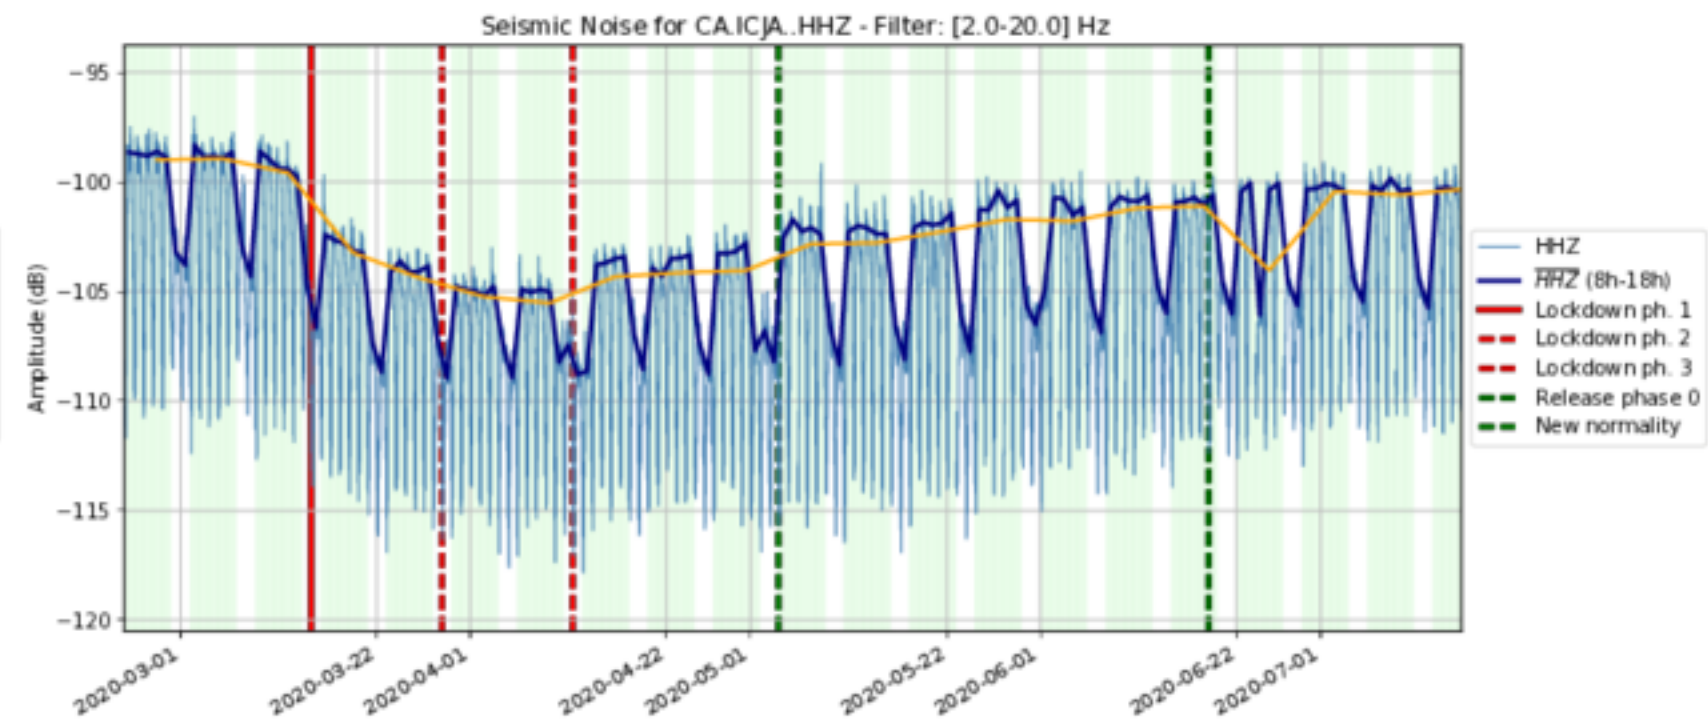

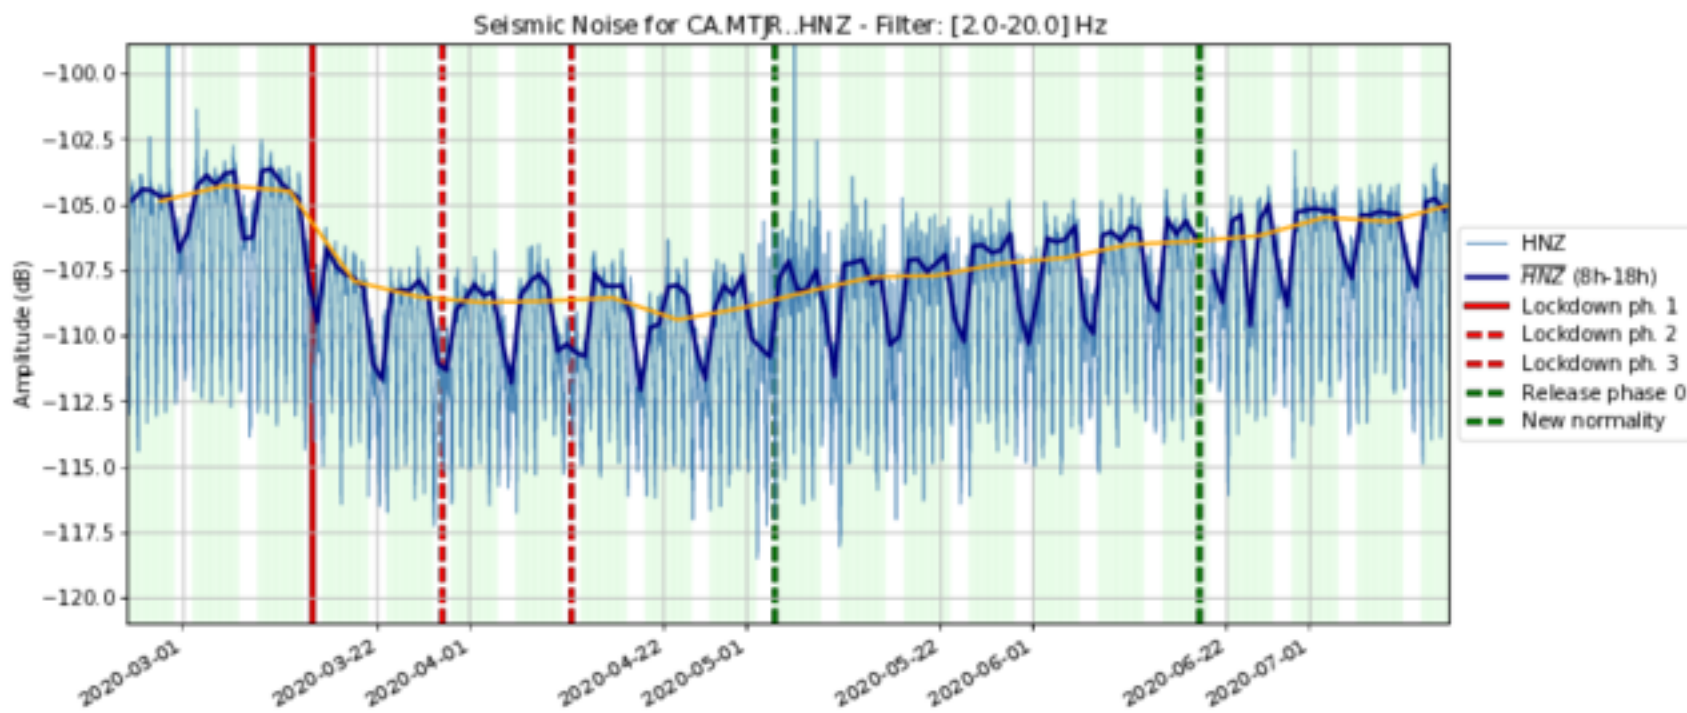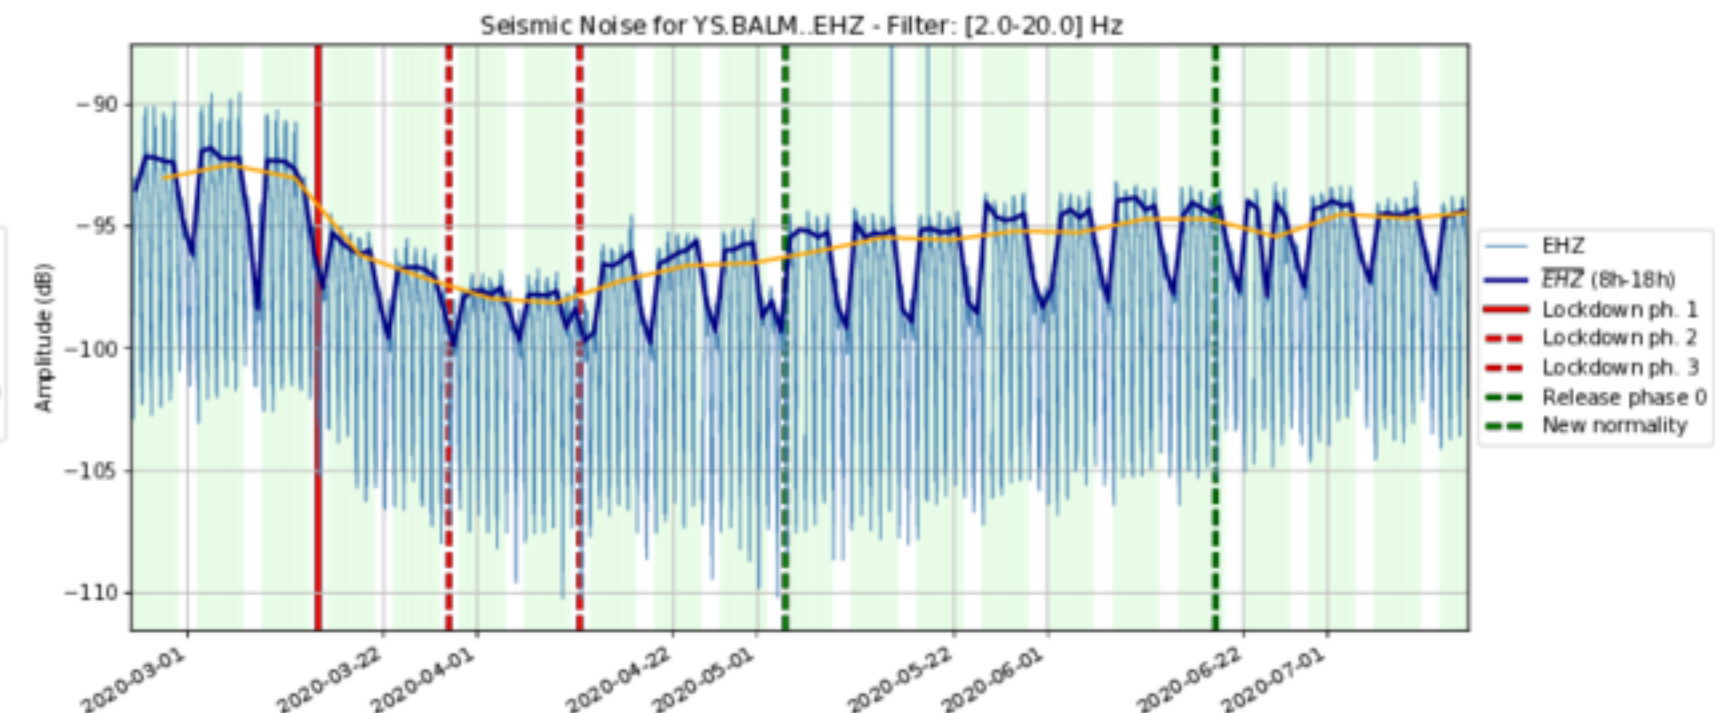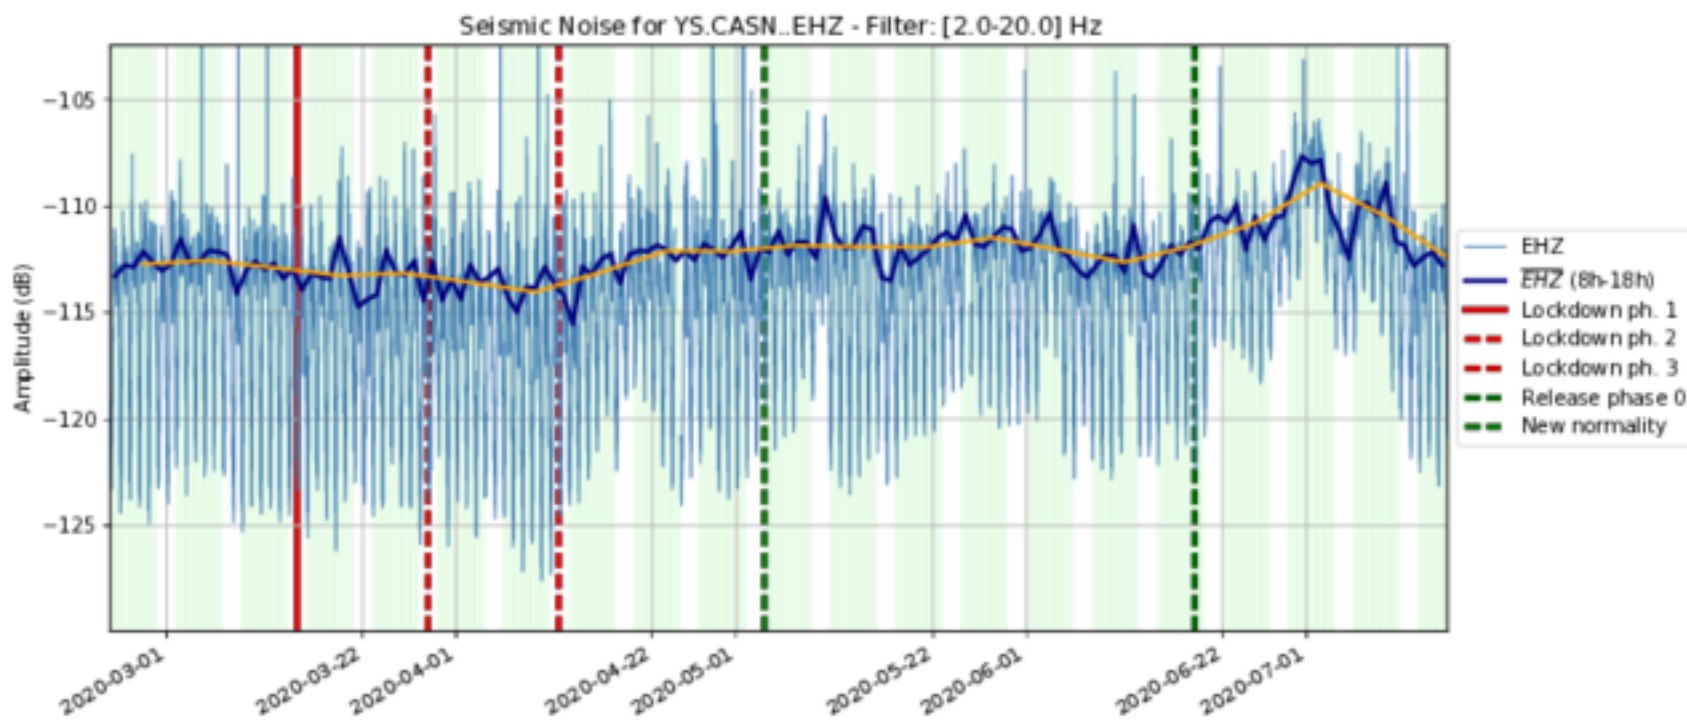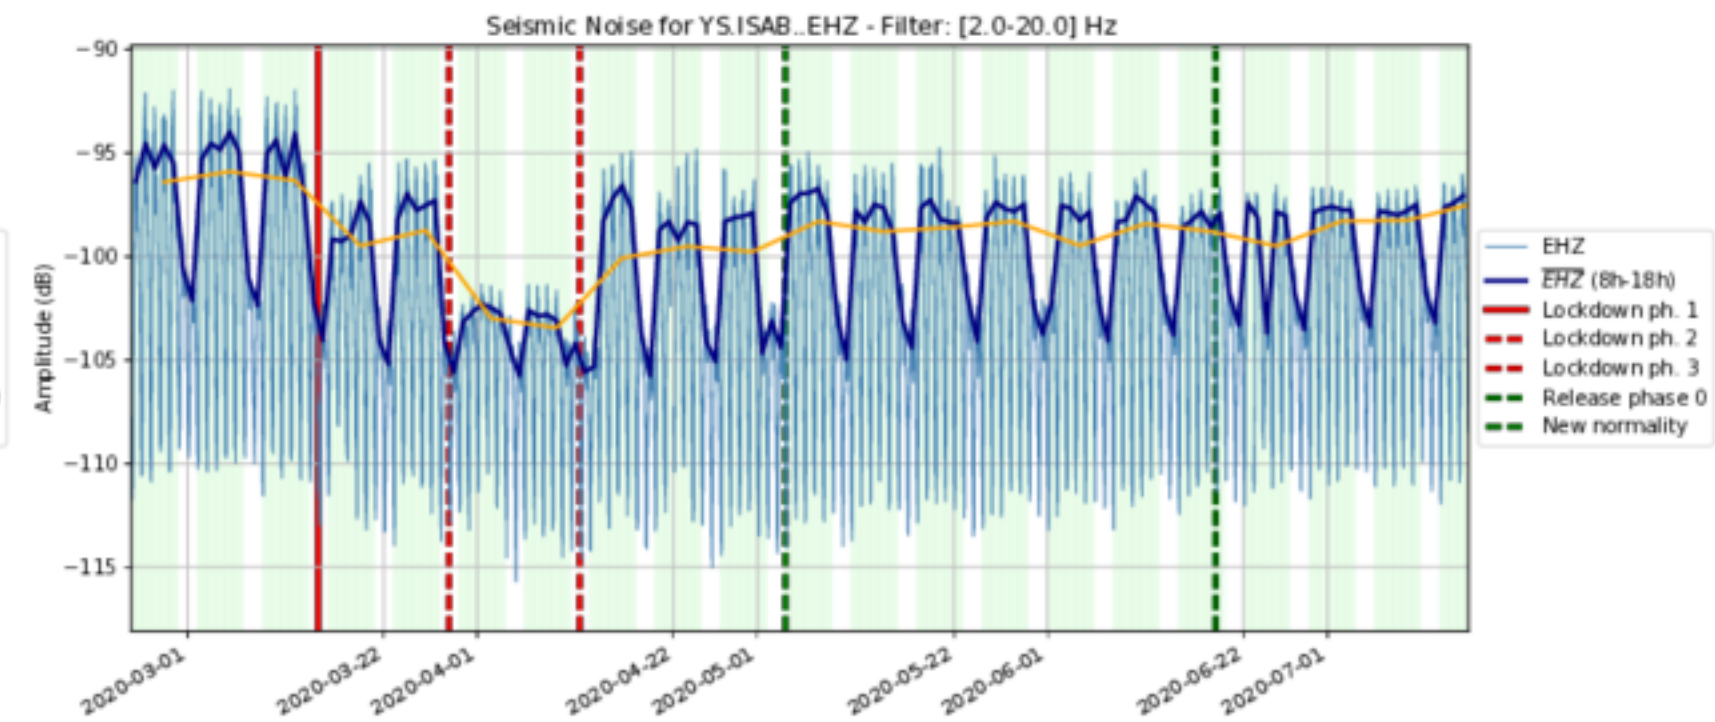



Seismic Noise for YS.JPLA.EHZ - Filter: [2.0-20.0] Hz

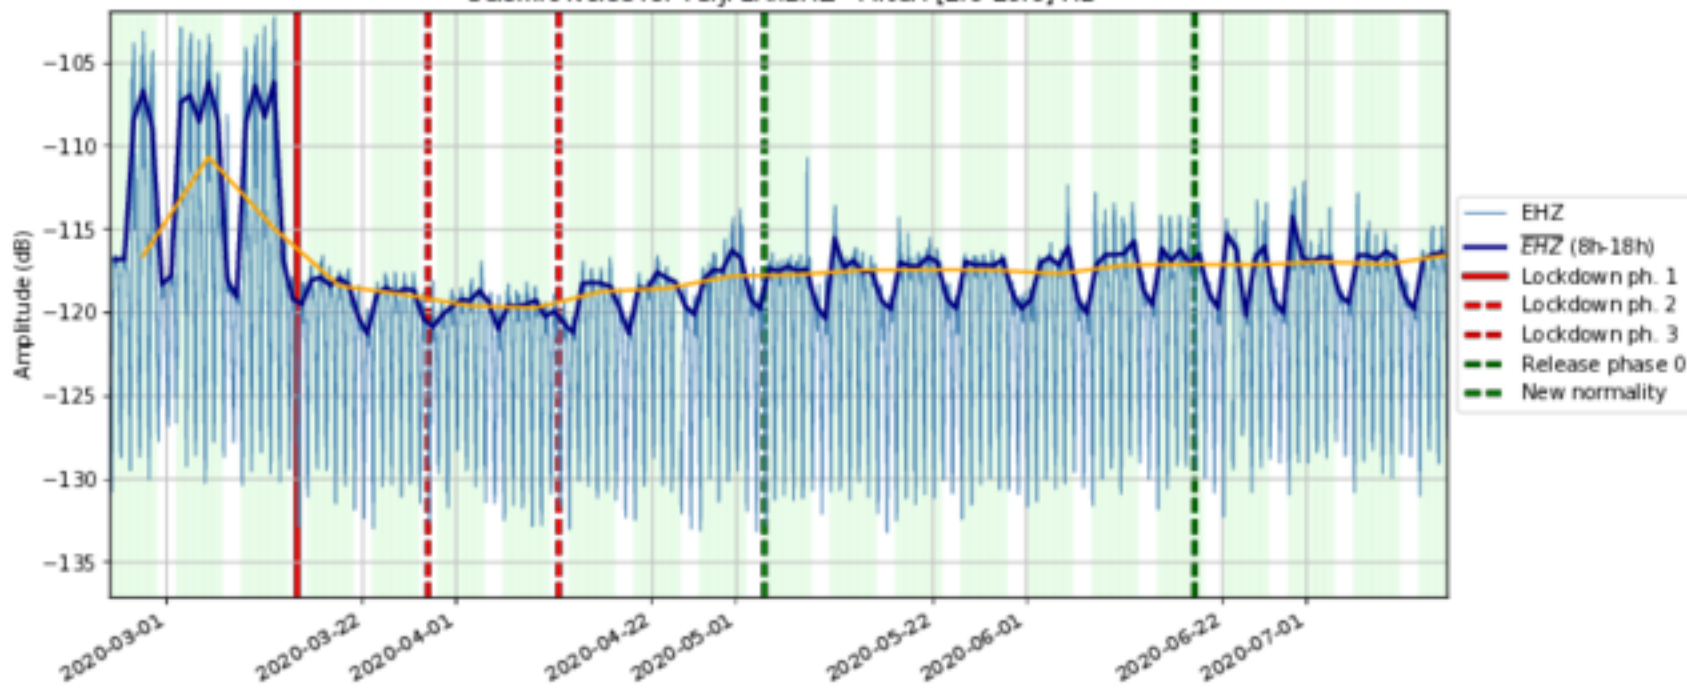

Seismic Noise for YS.MILA.EHZ - Filter: [2.0-20.0] Hz

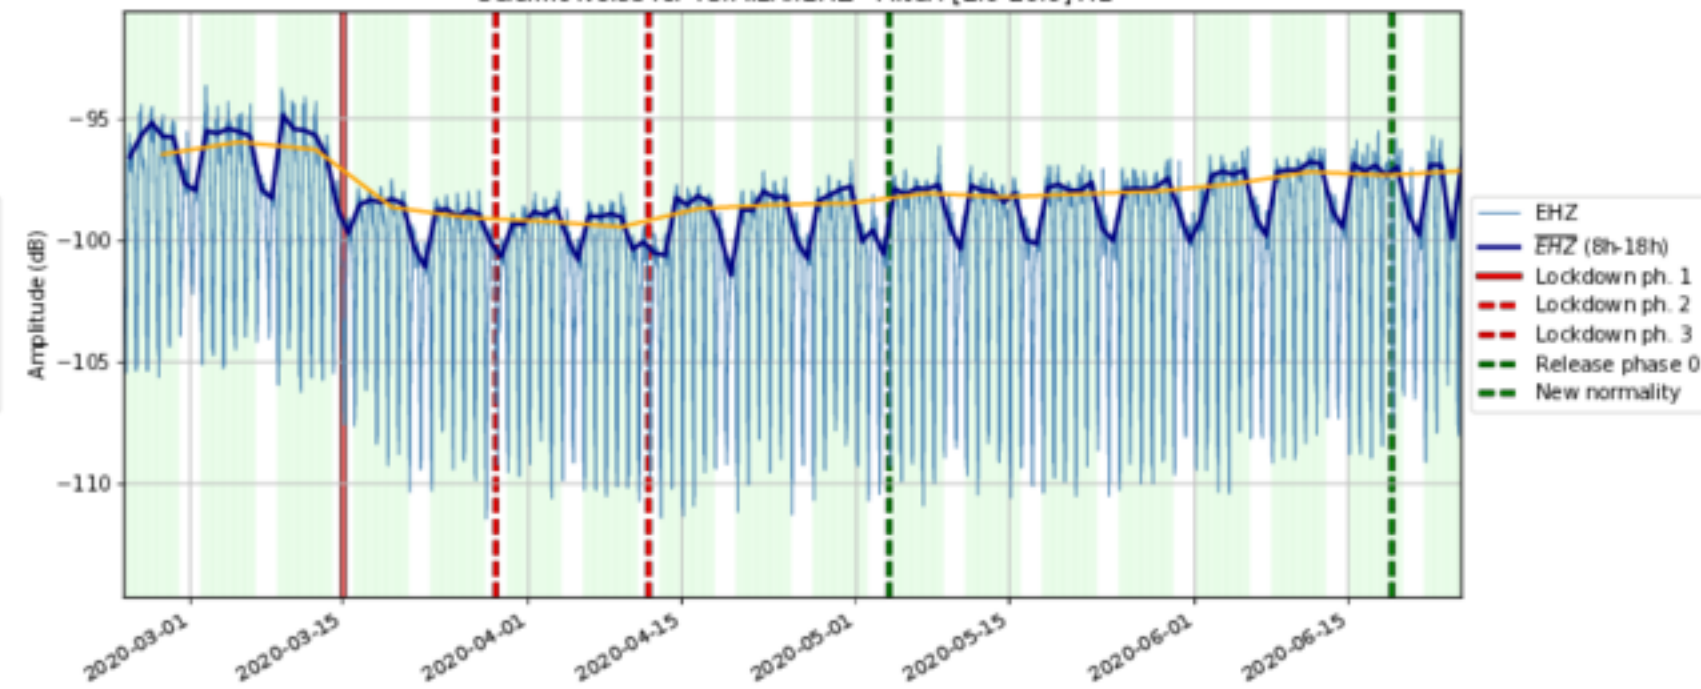

Seismic Noise for YS.PORT..EHZ - Filter: [2.0-20.0] Hz

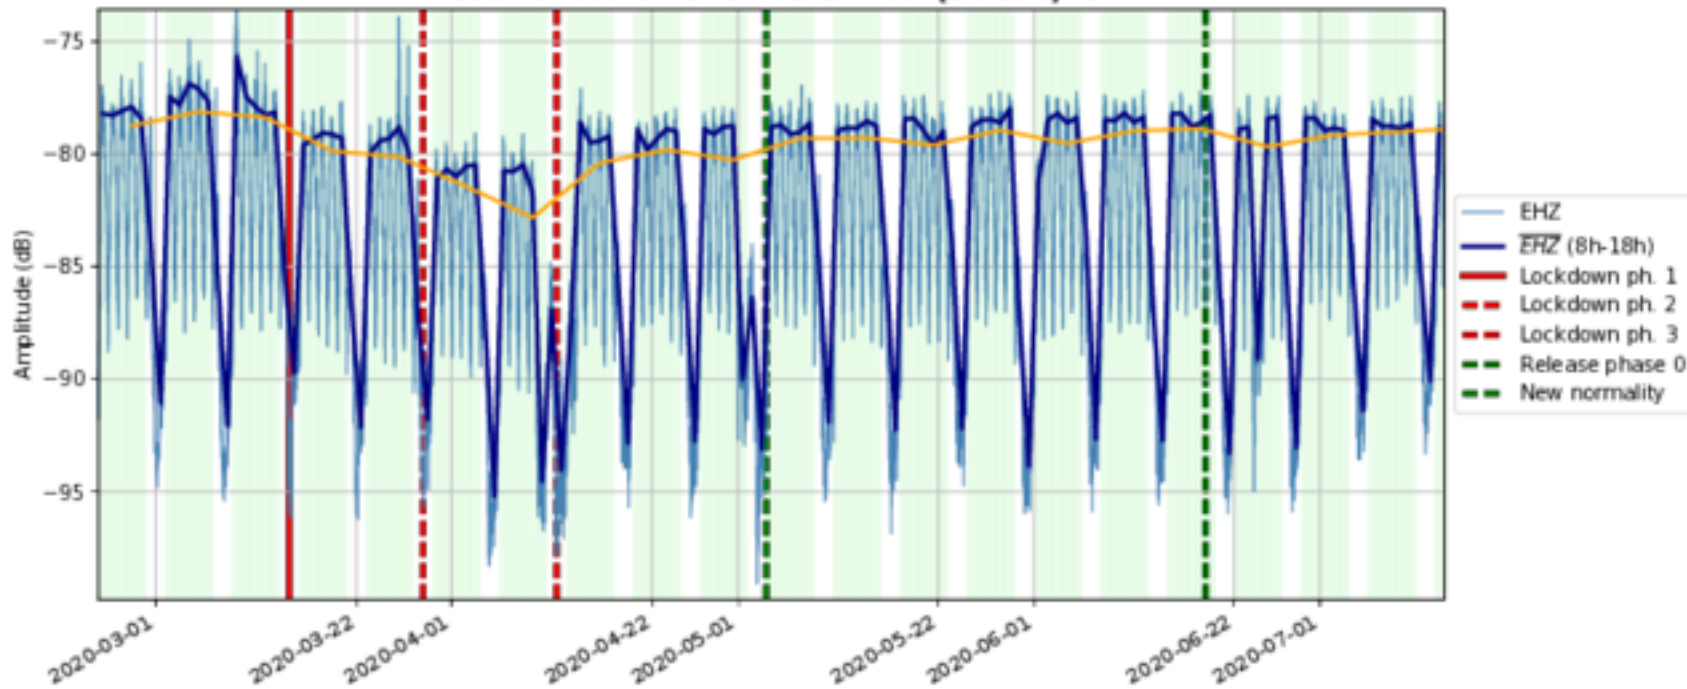

Supplement: Supplementary file 3 [file se-2020-190-supplement.zip]
