# Supplementary material for: Seismic monitoring of urban activity in Barcelona during COVID-19 lockdown
Source: Copernicus journal article supplement (doi:10.5194/se-2020-190), 2020-11-27

AM.R0A45.00.EHZ

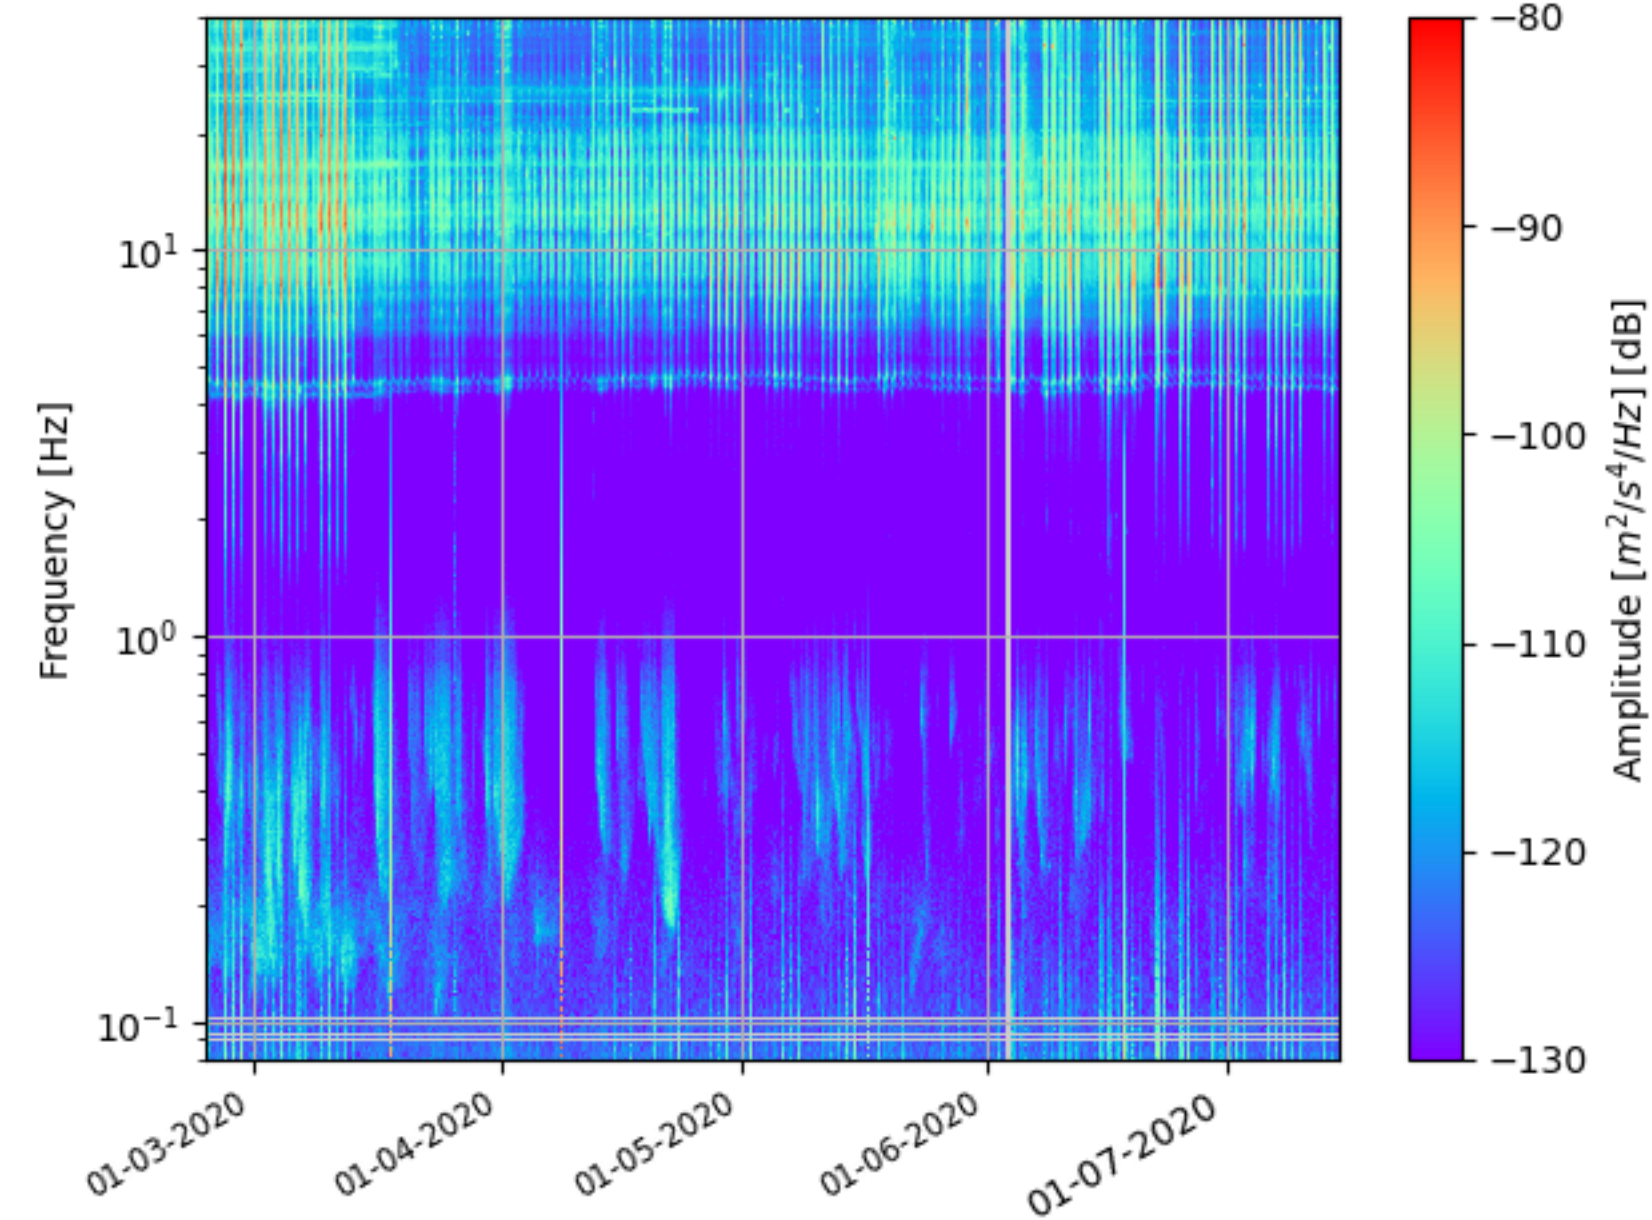

AM.R4B31.00.EHZ

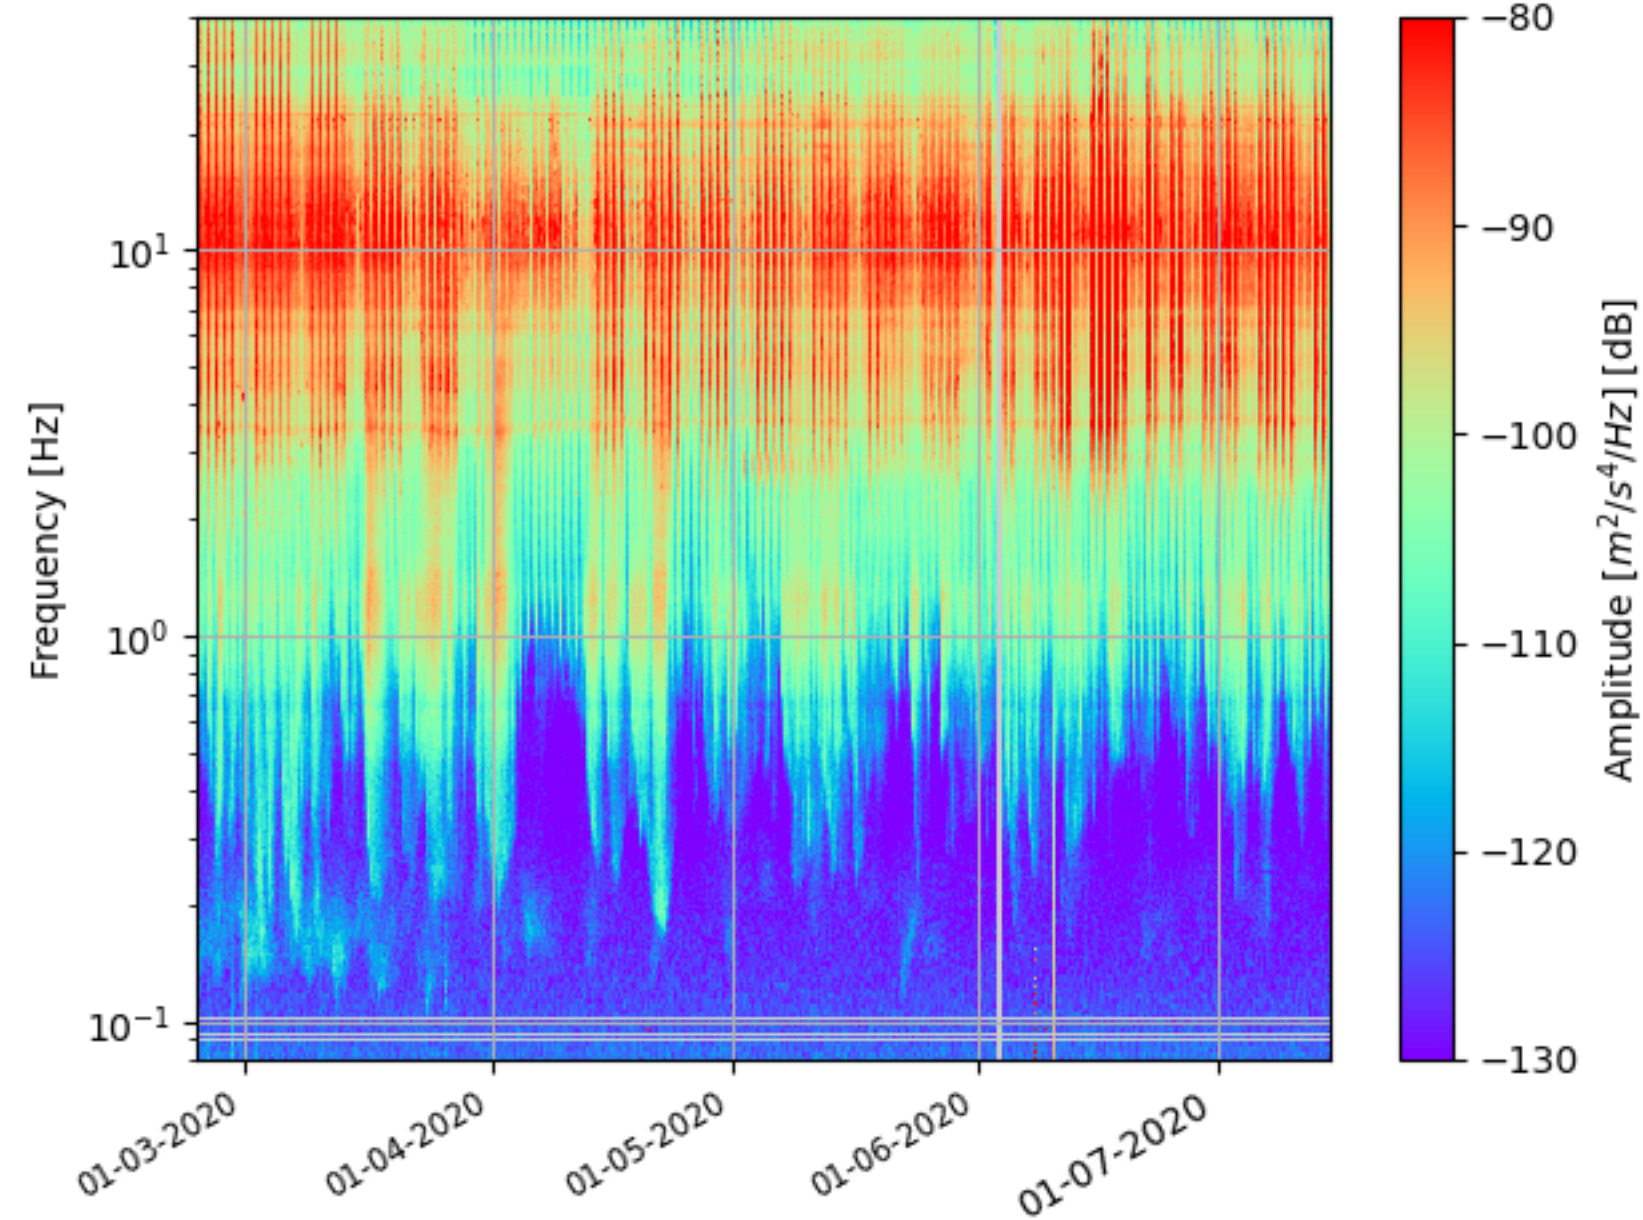

AM.R4D07.00.EHZ

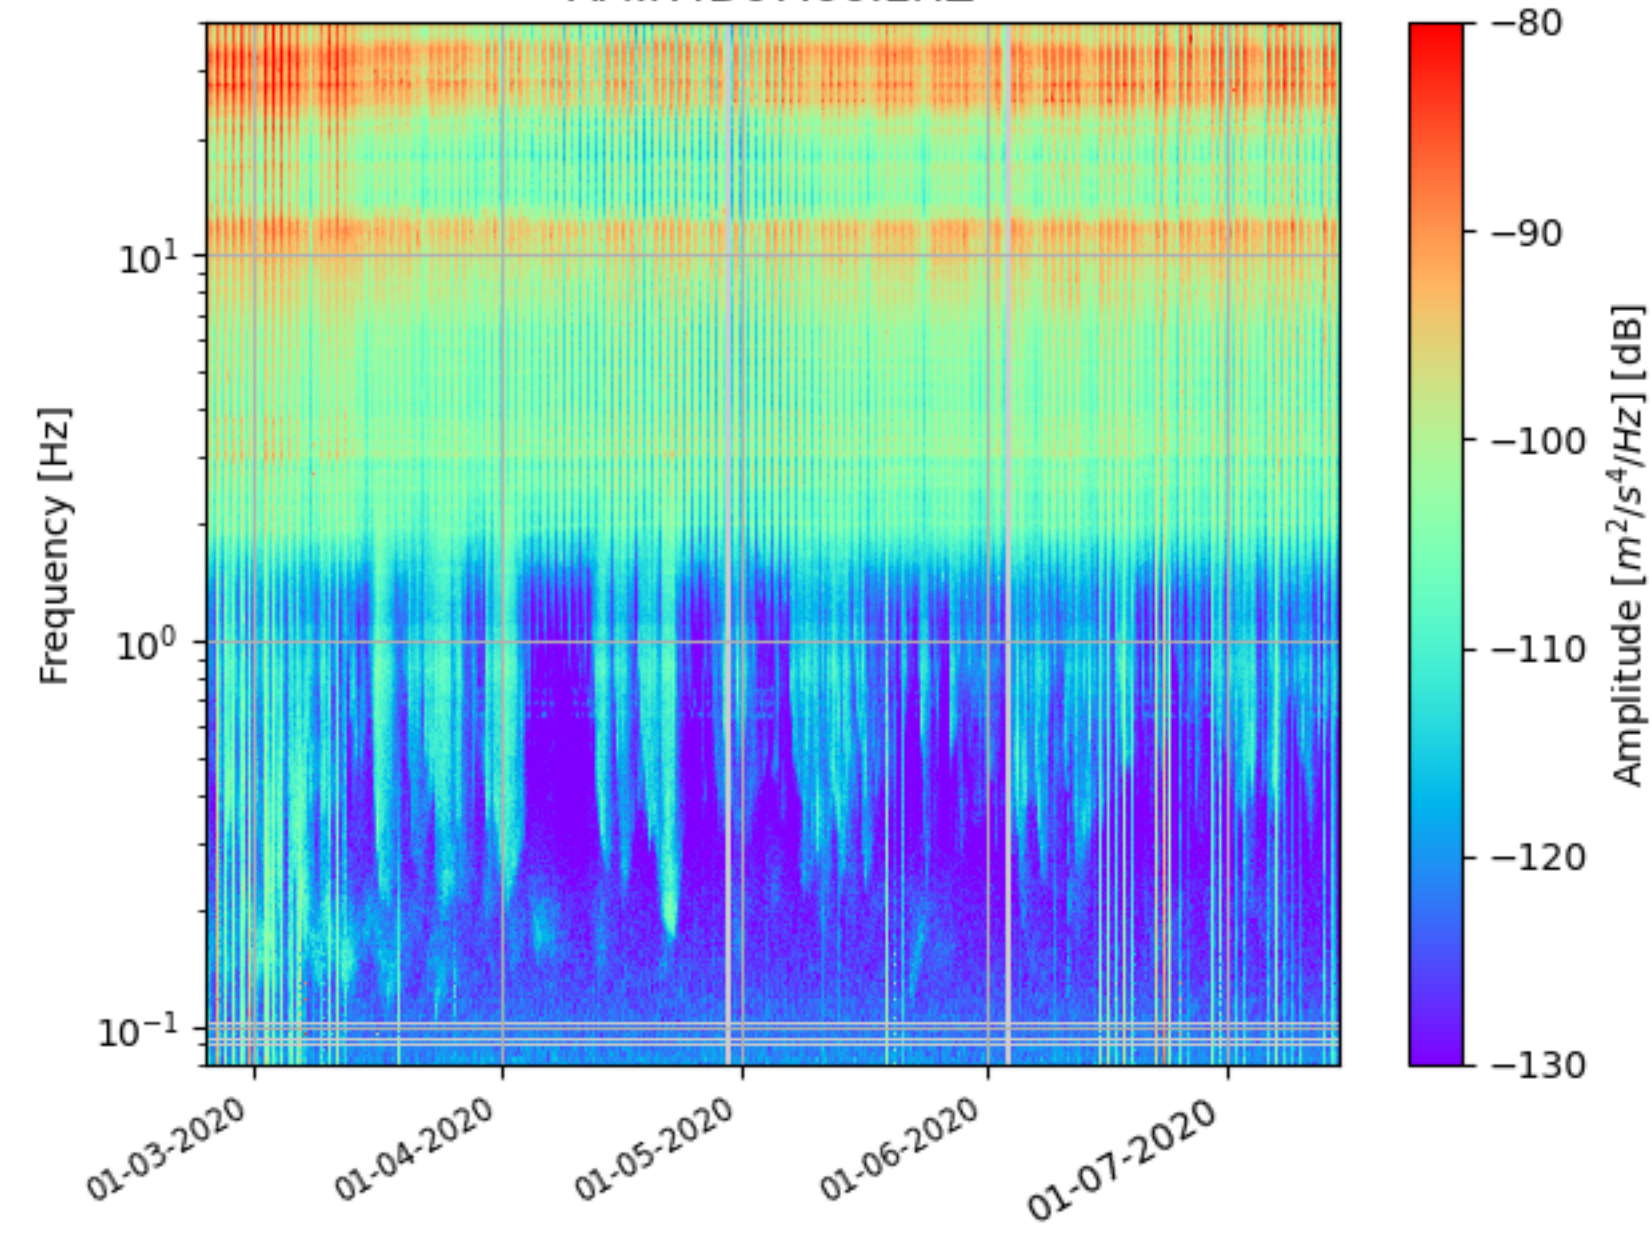

AM.R59E2.00.SHZ

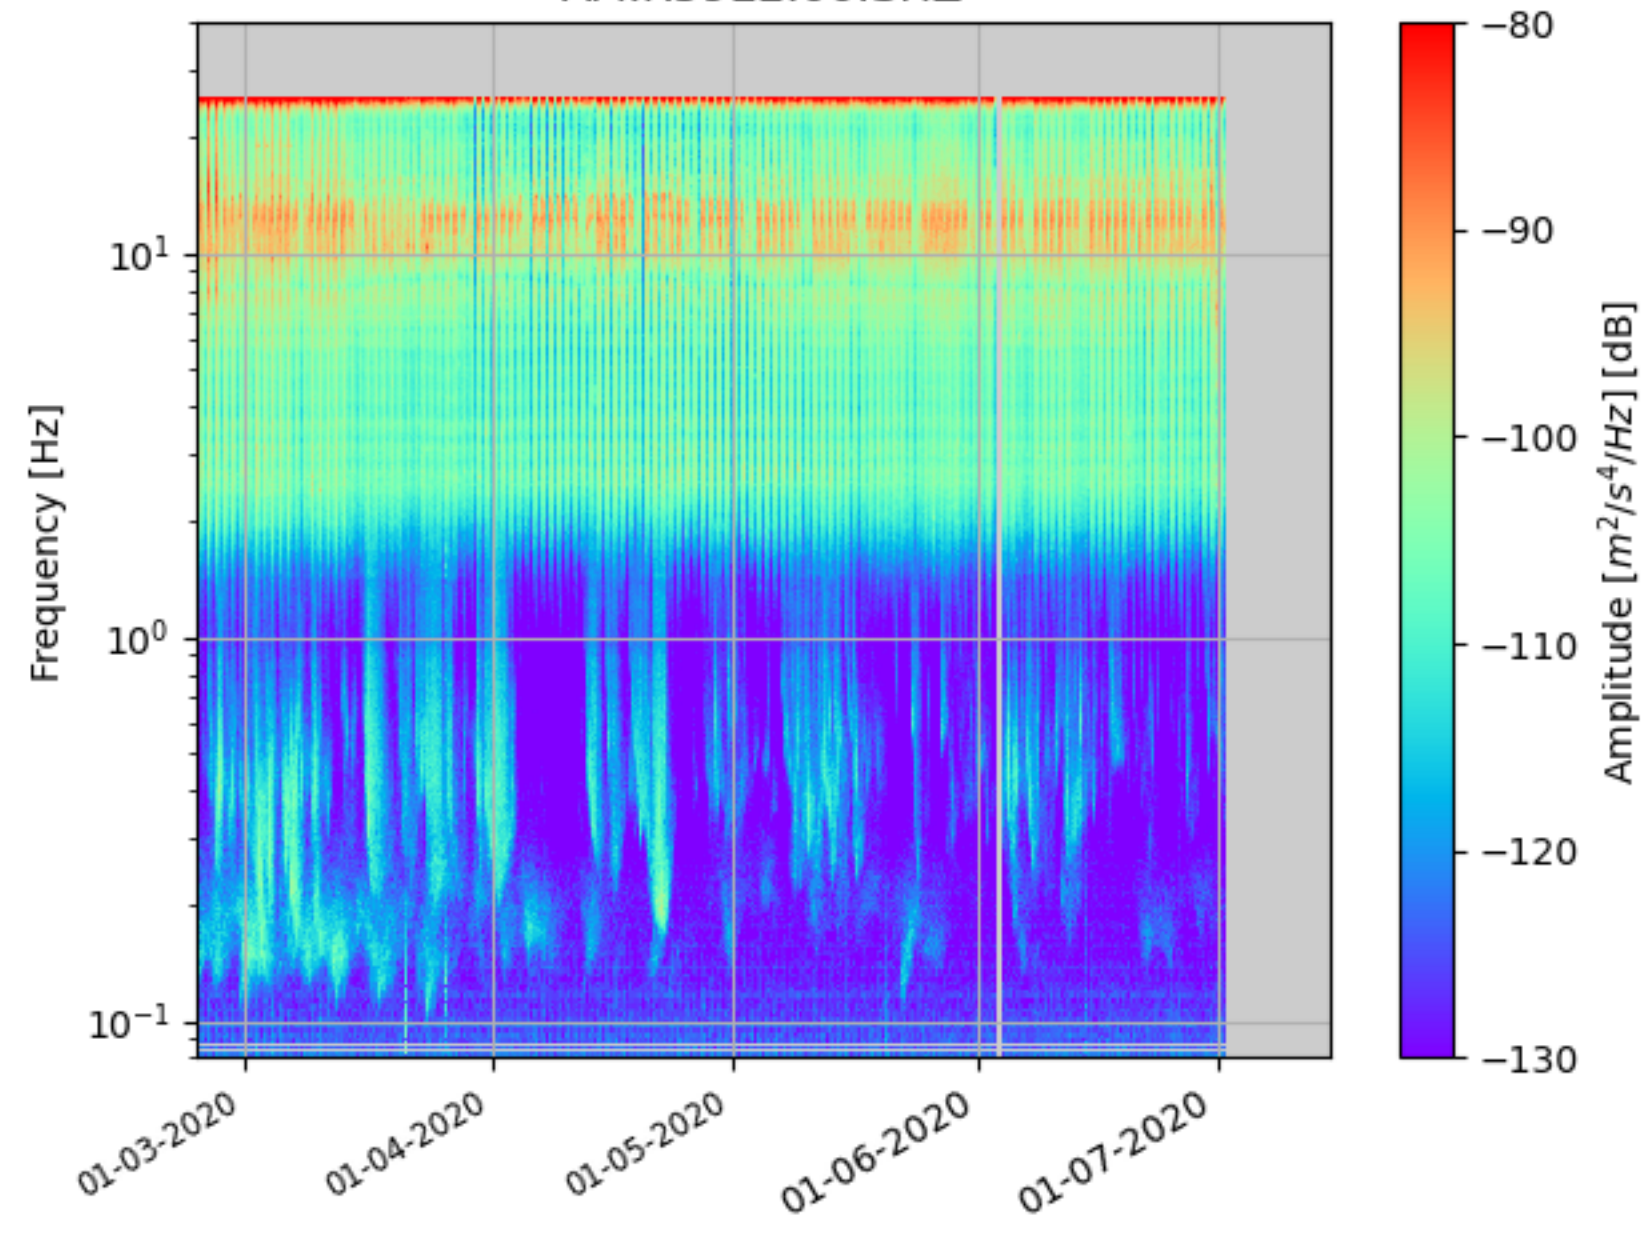



AM.R888C.00.EHZ

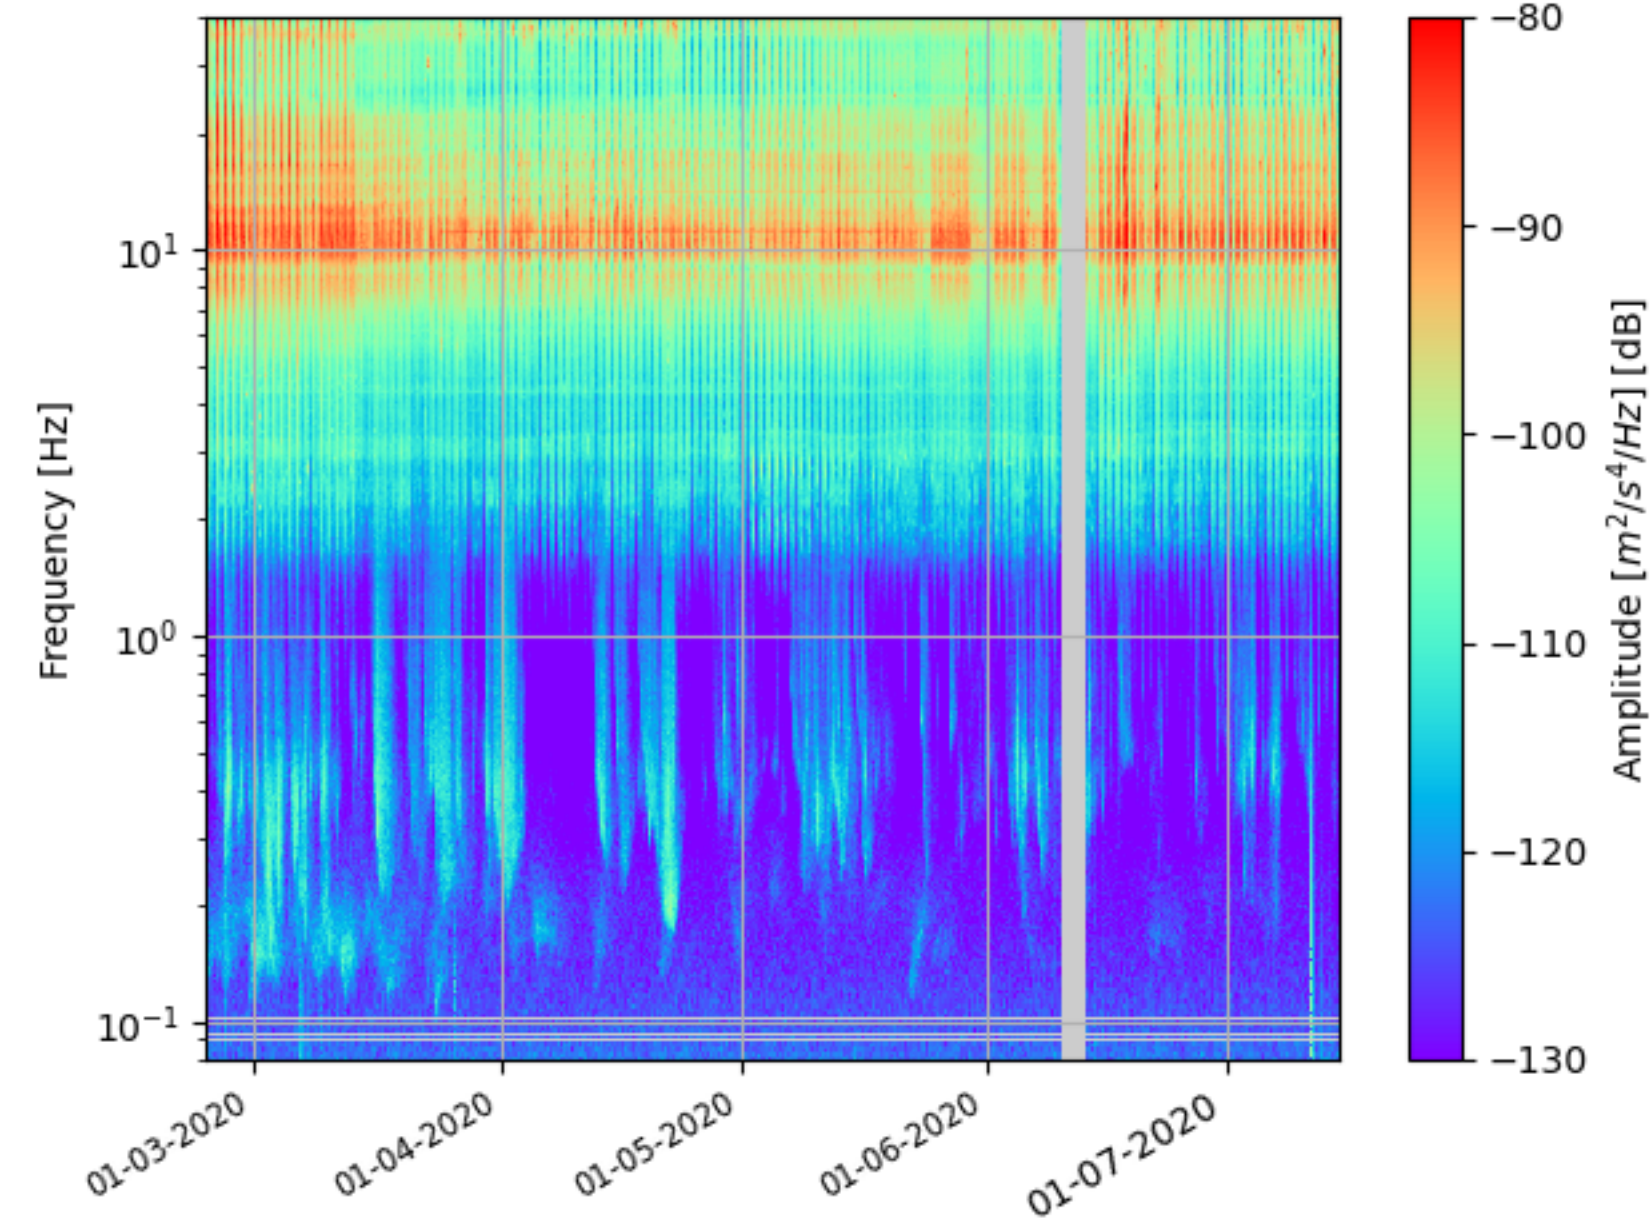

AM.RBE49.00.EHZ

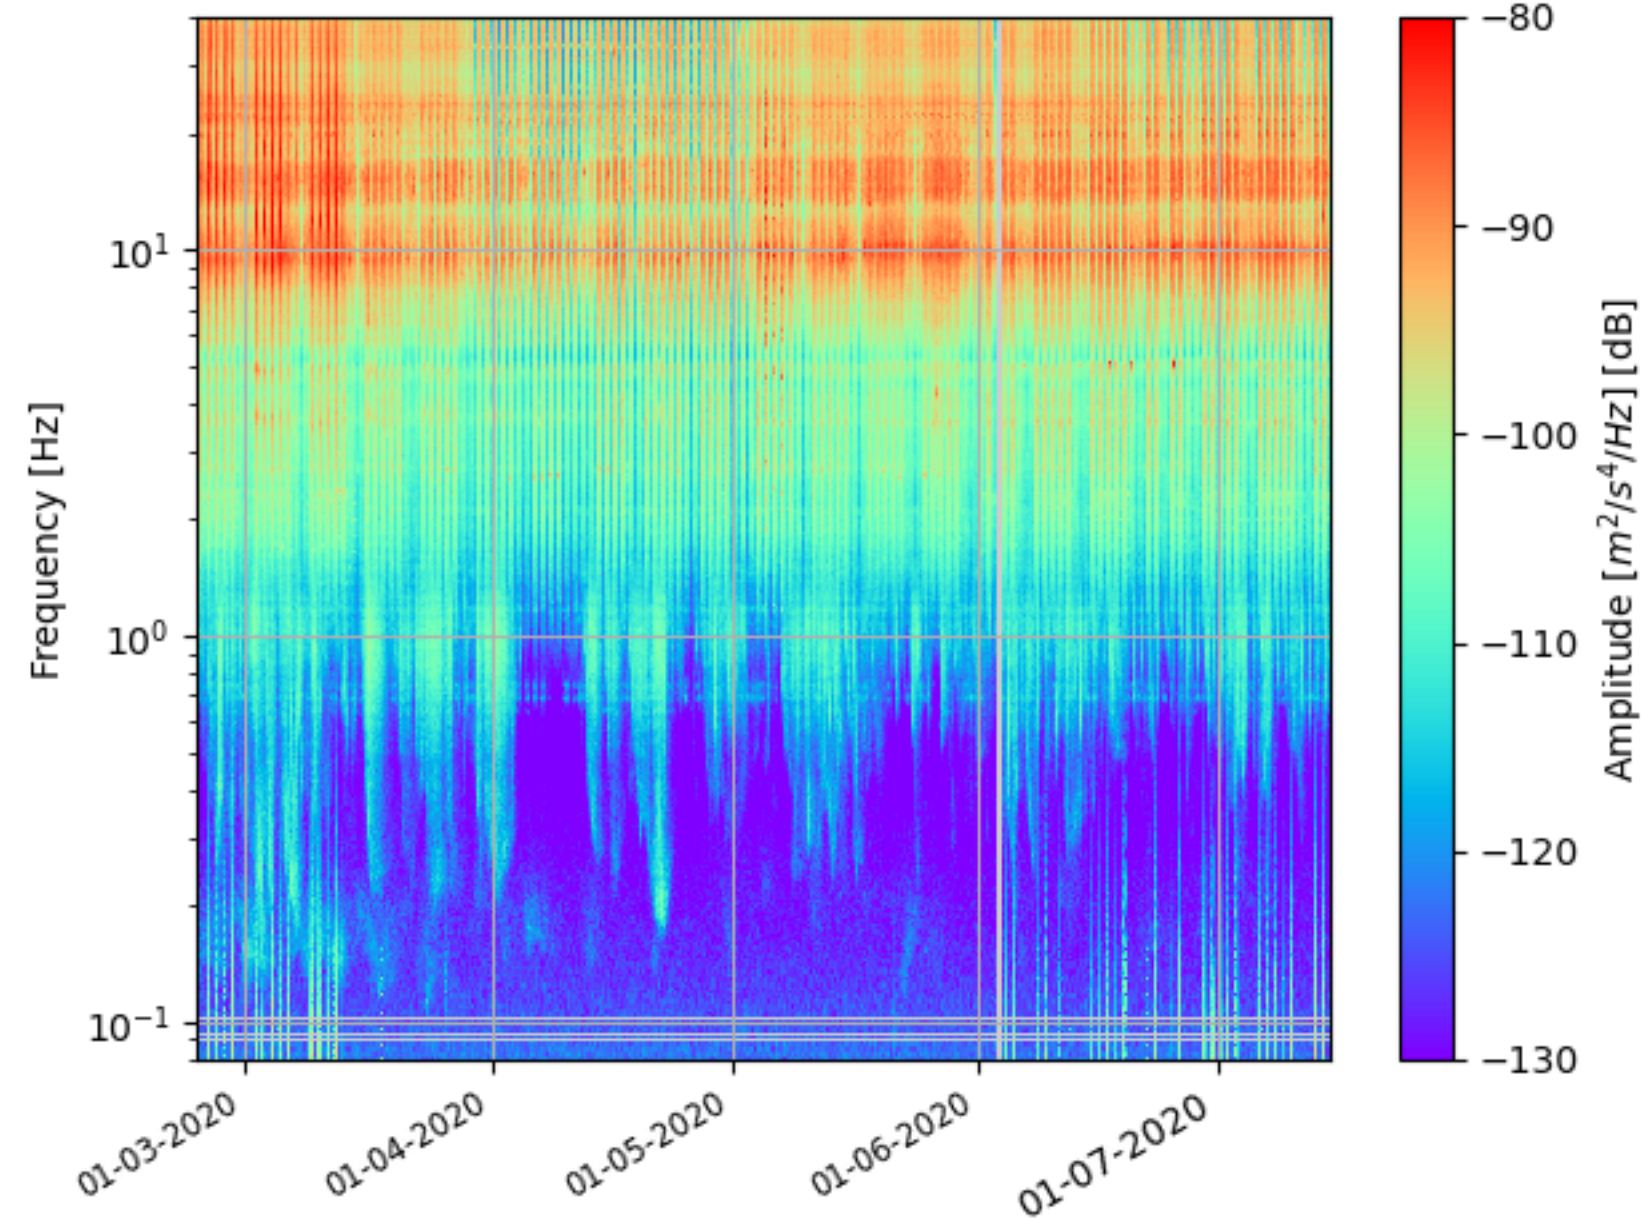

AM.RD3AF.00.EHZ

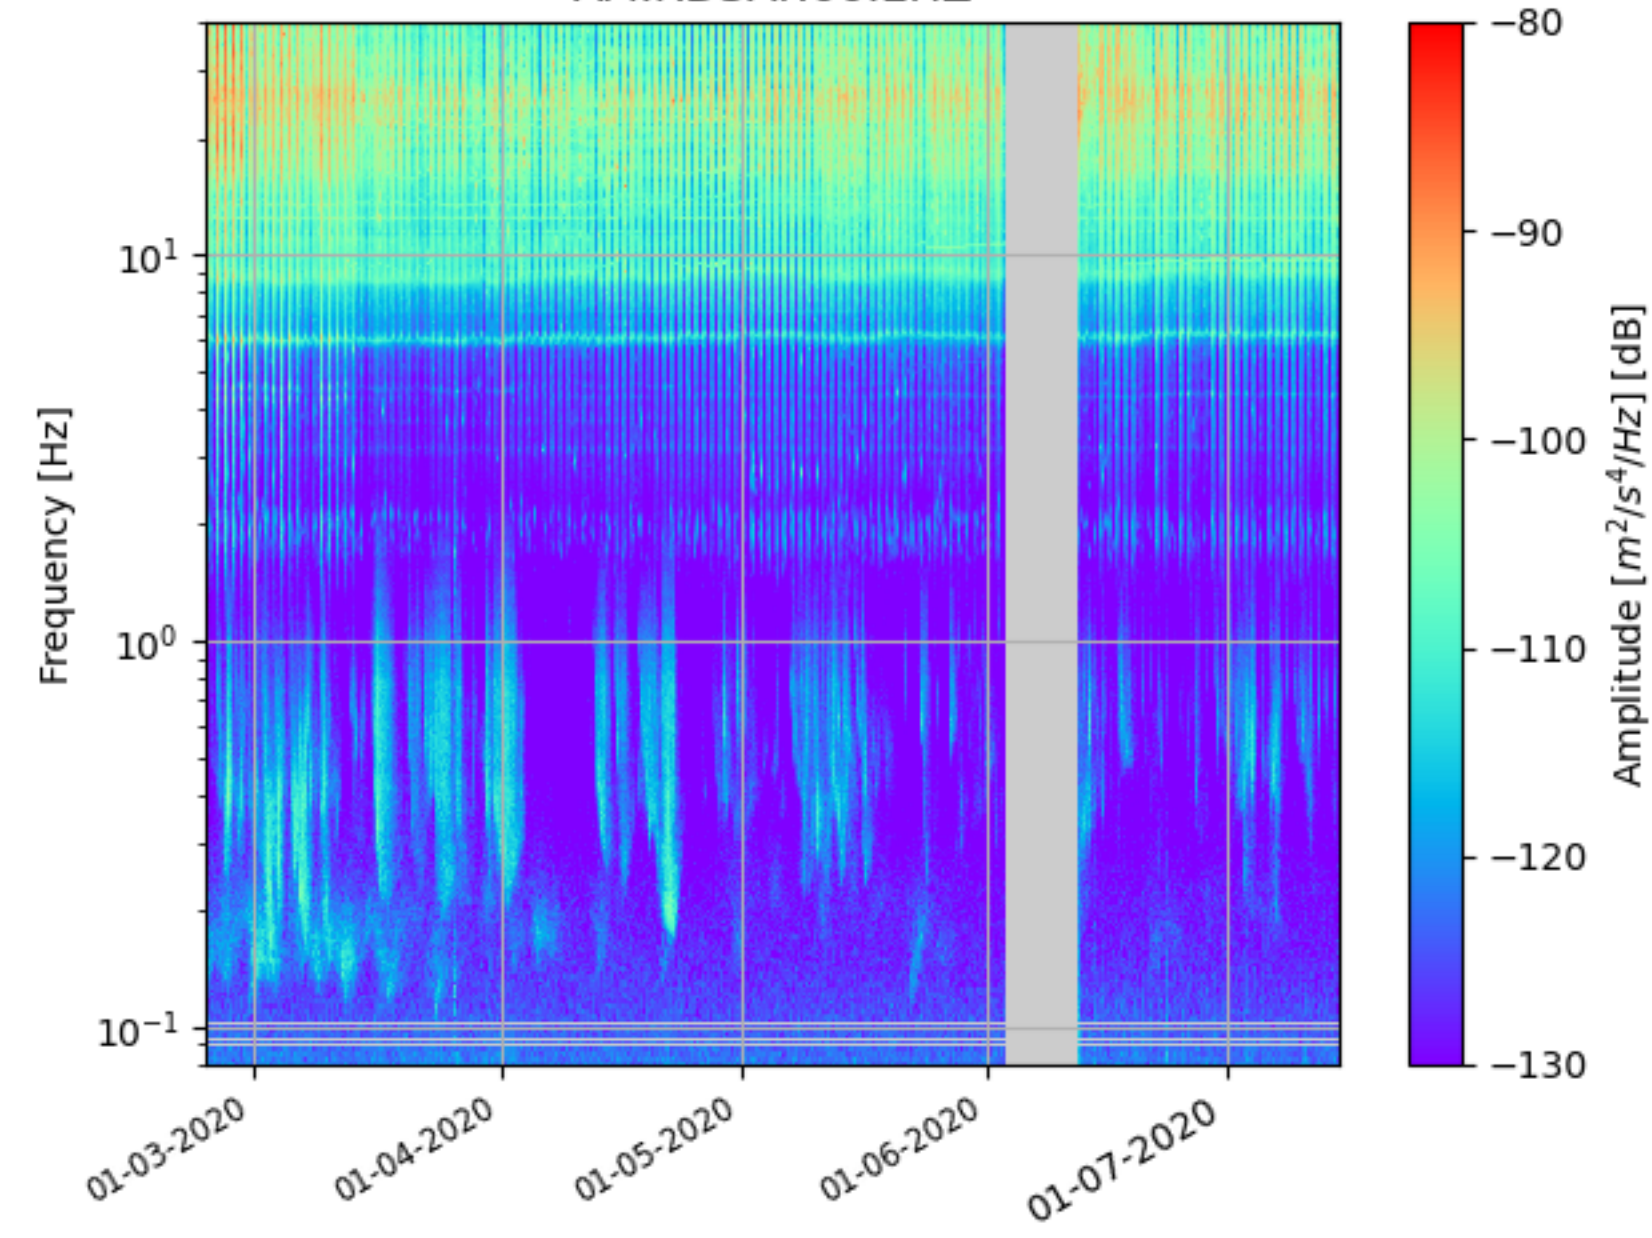

AM.RDB03.00.EHZ

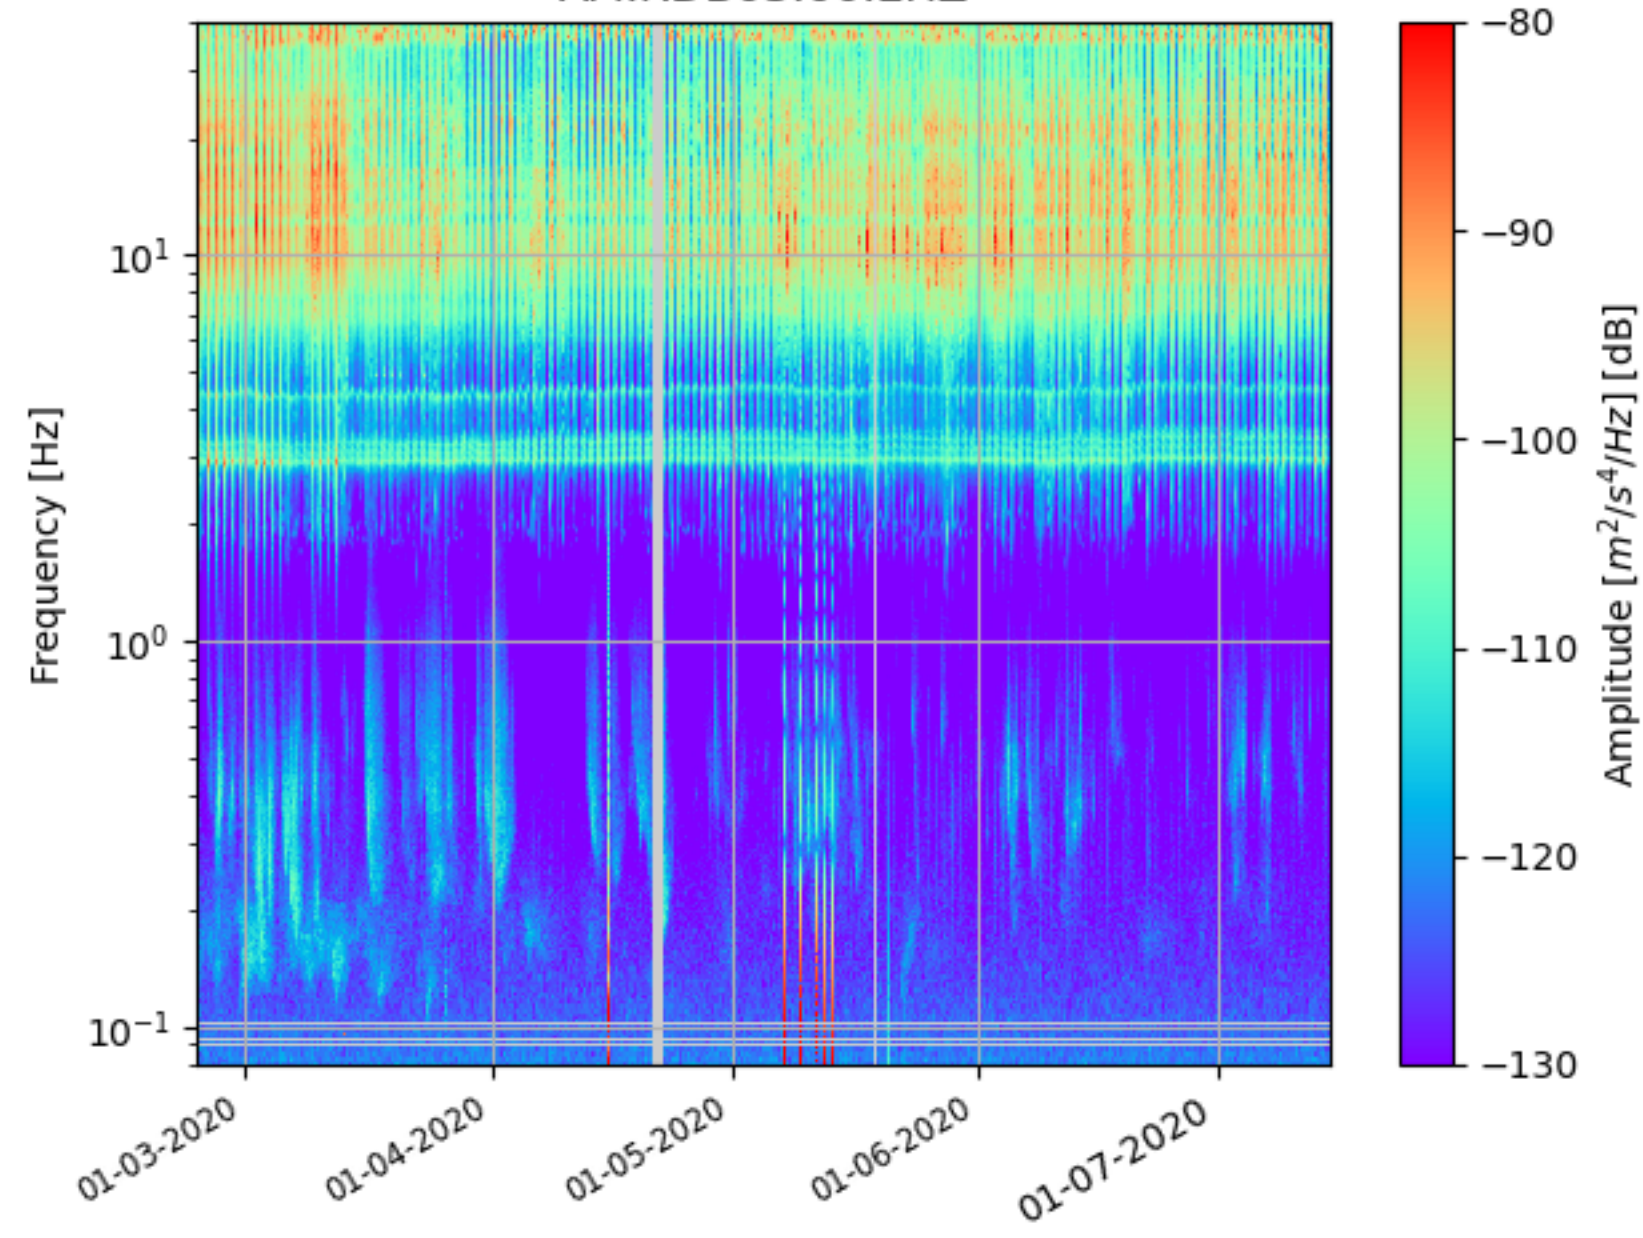



CA.BAIN..HNZ

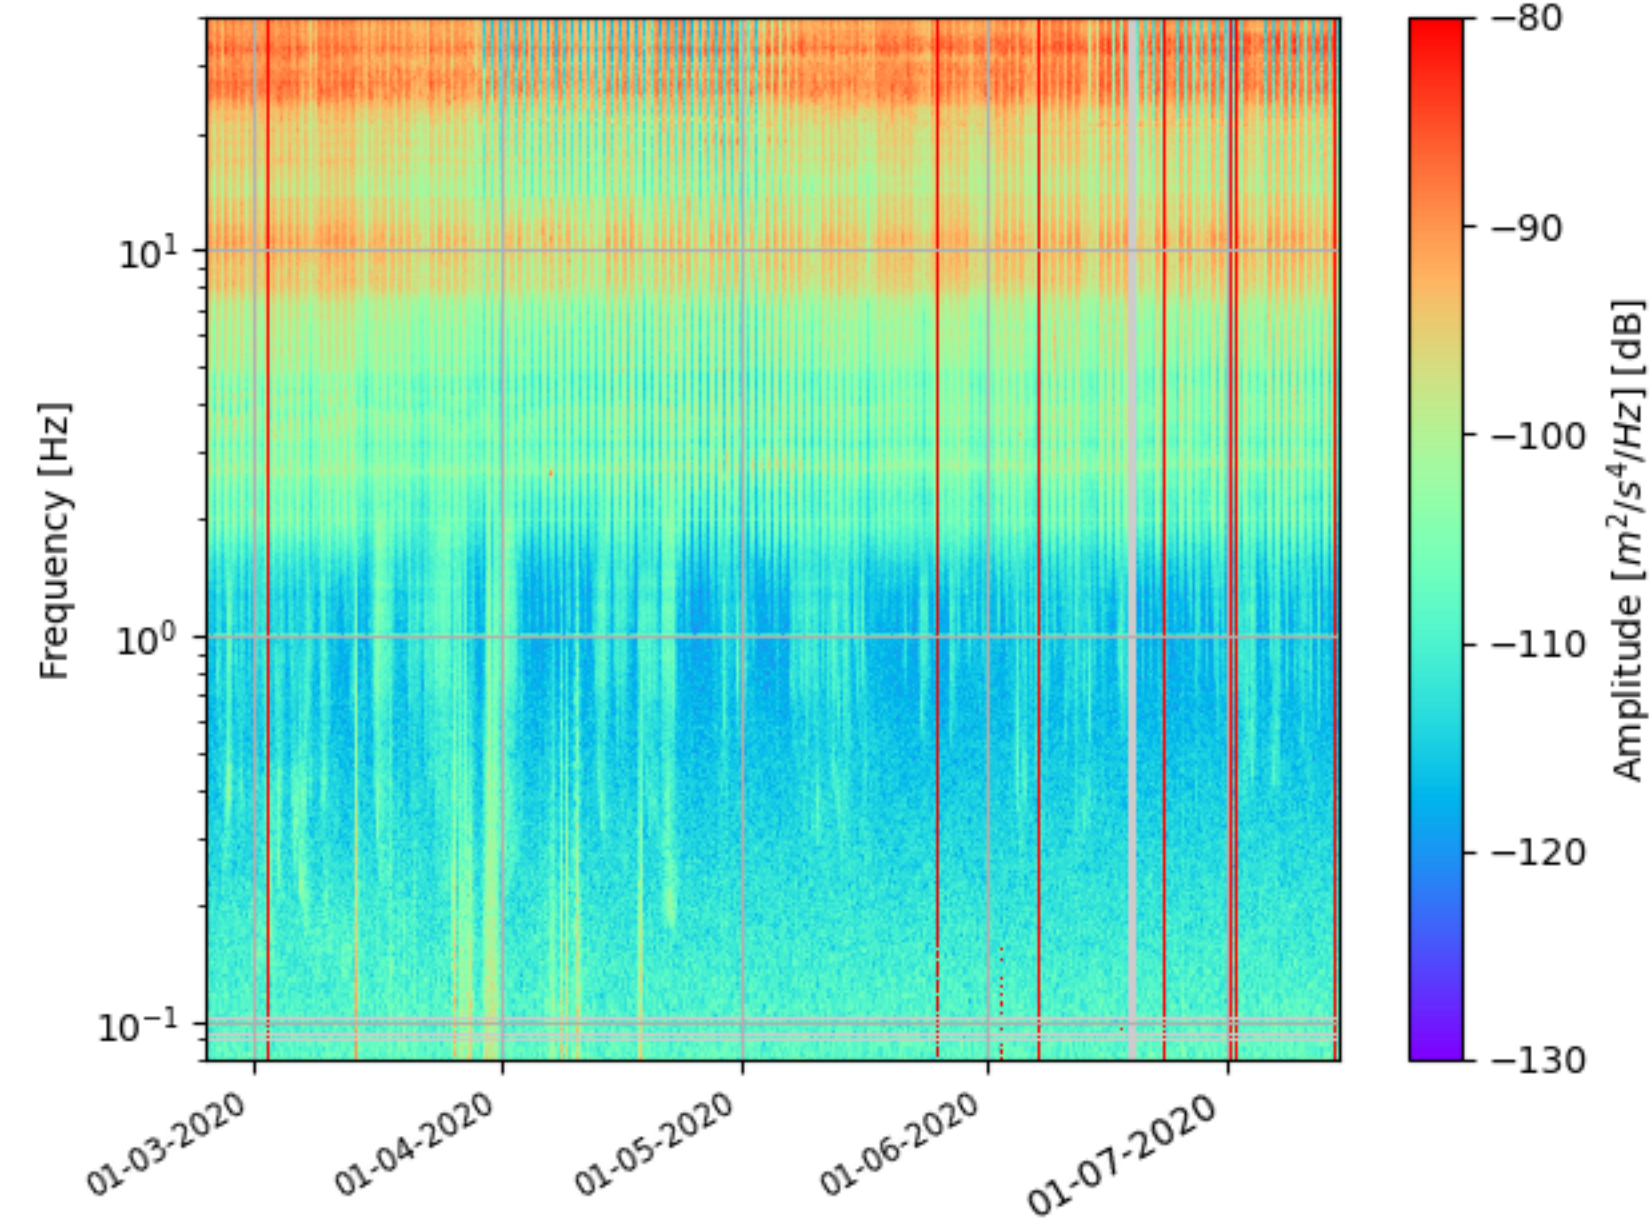

CA.BAJU..HNZ

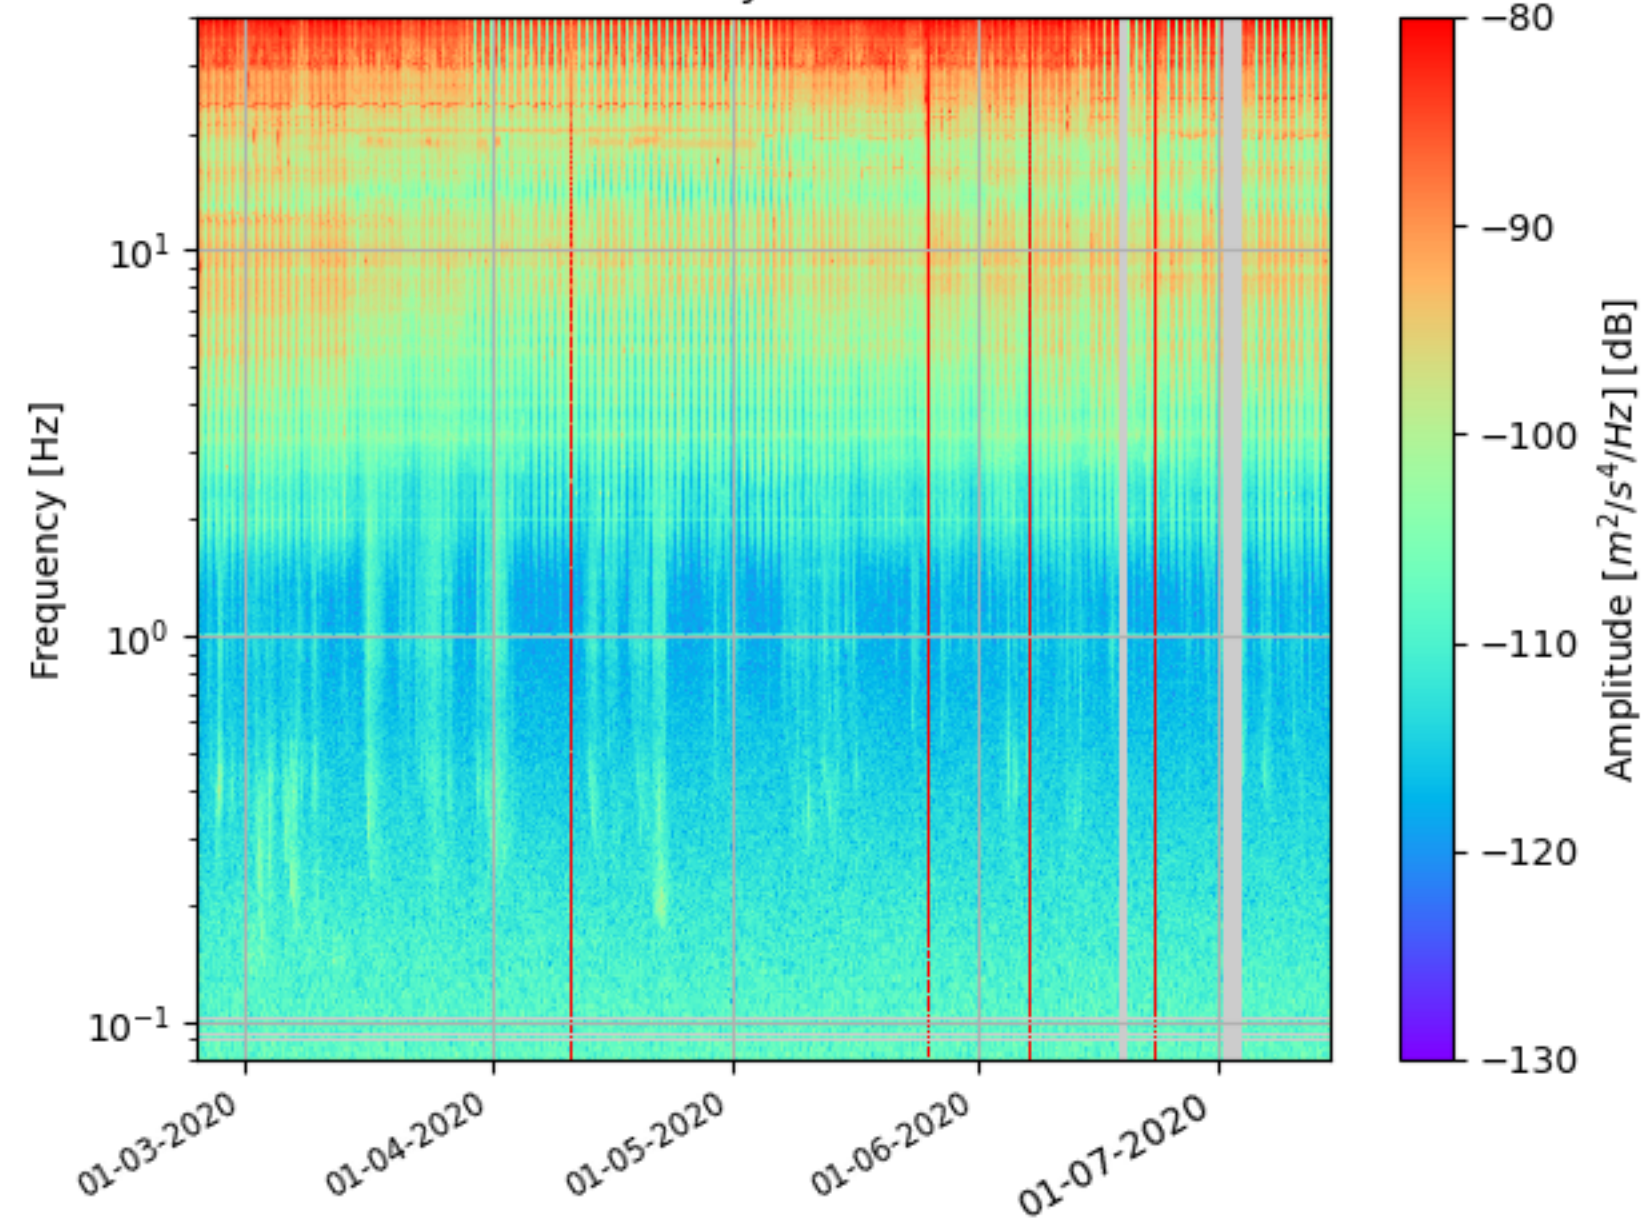

CA.FBR..HNZ

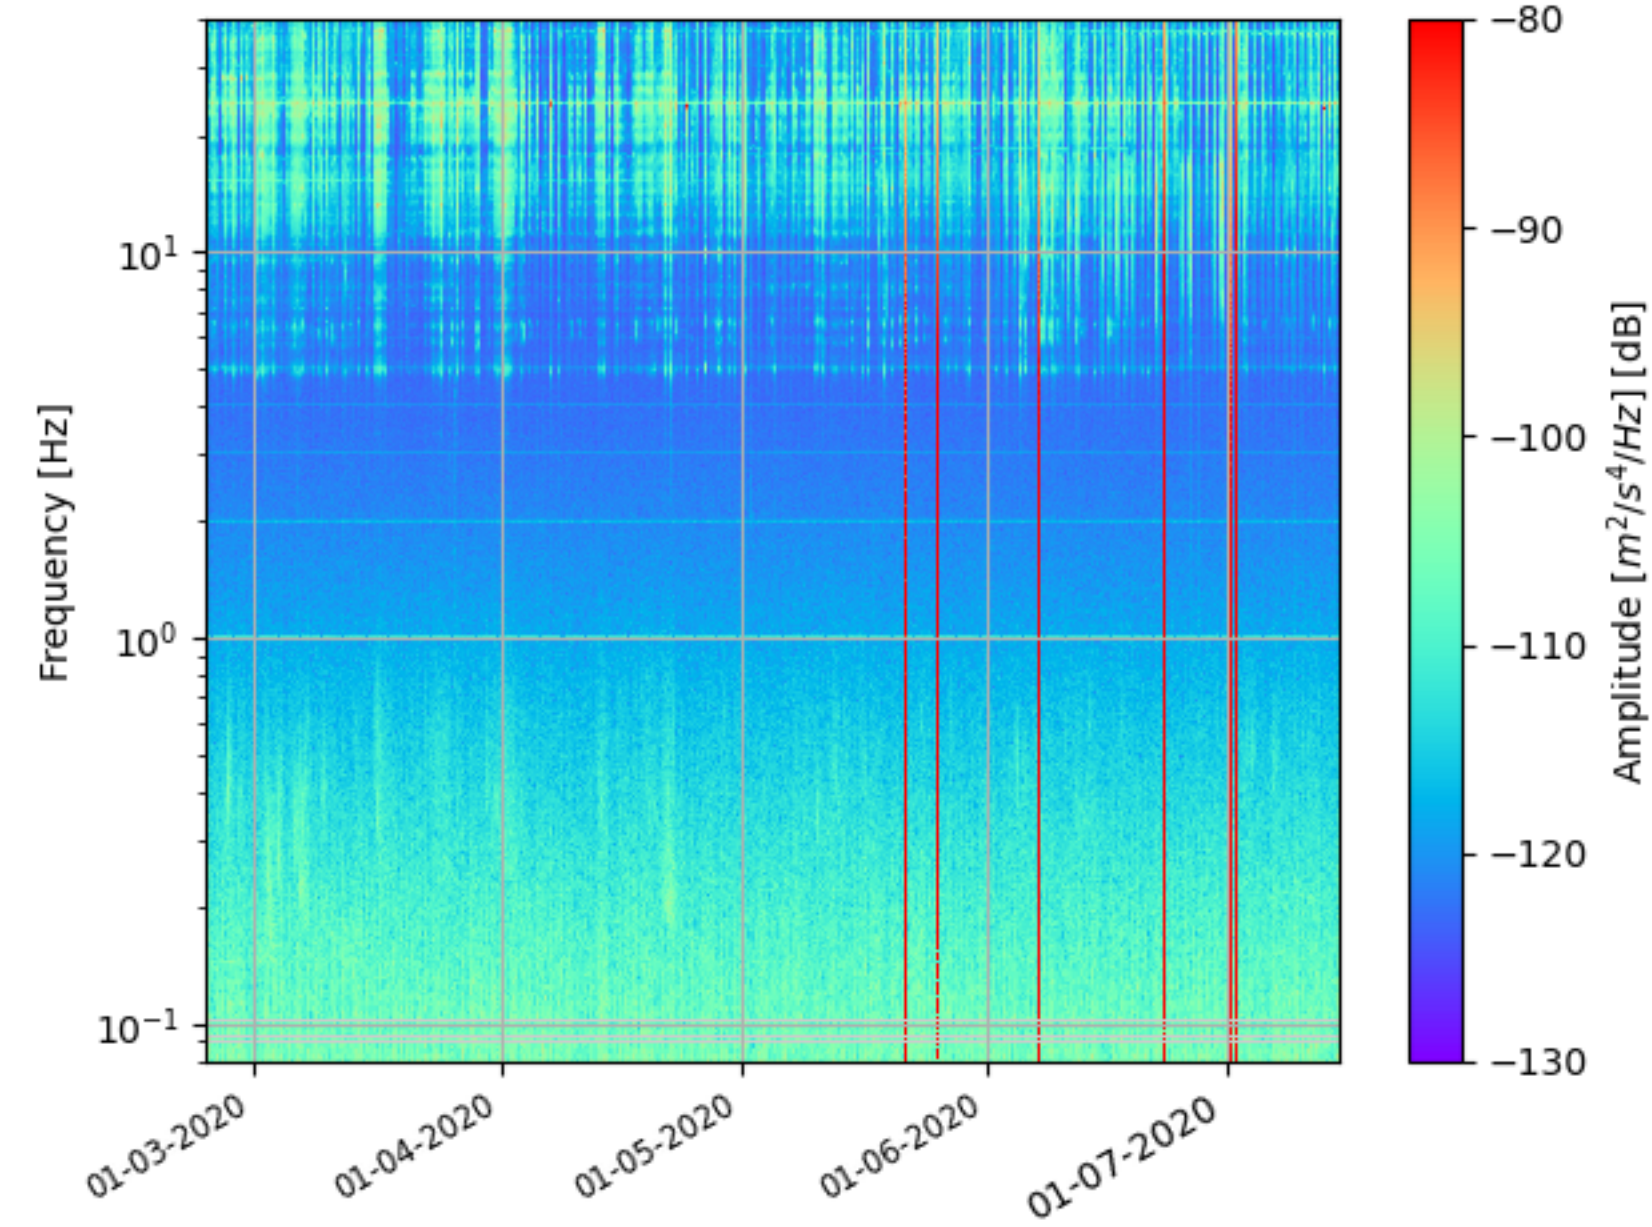

CA.ICJA..HHZ

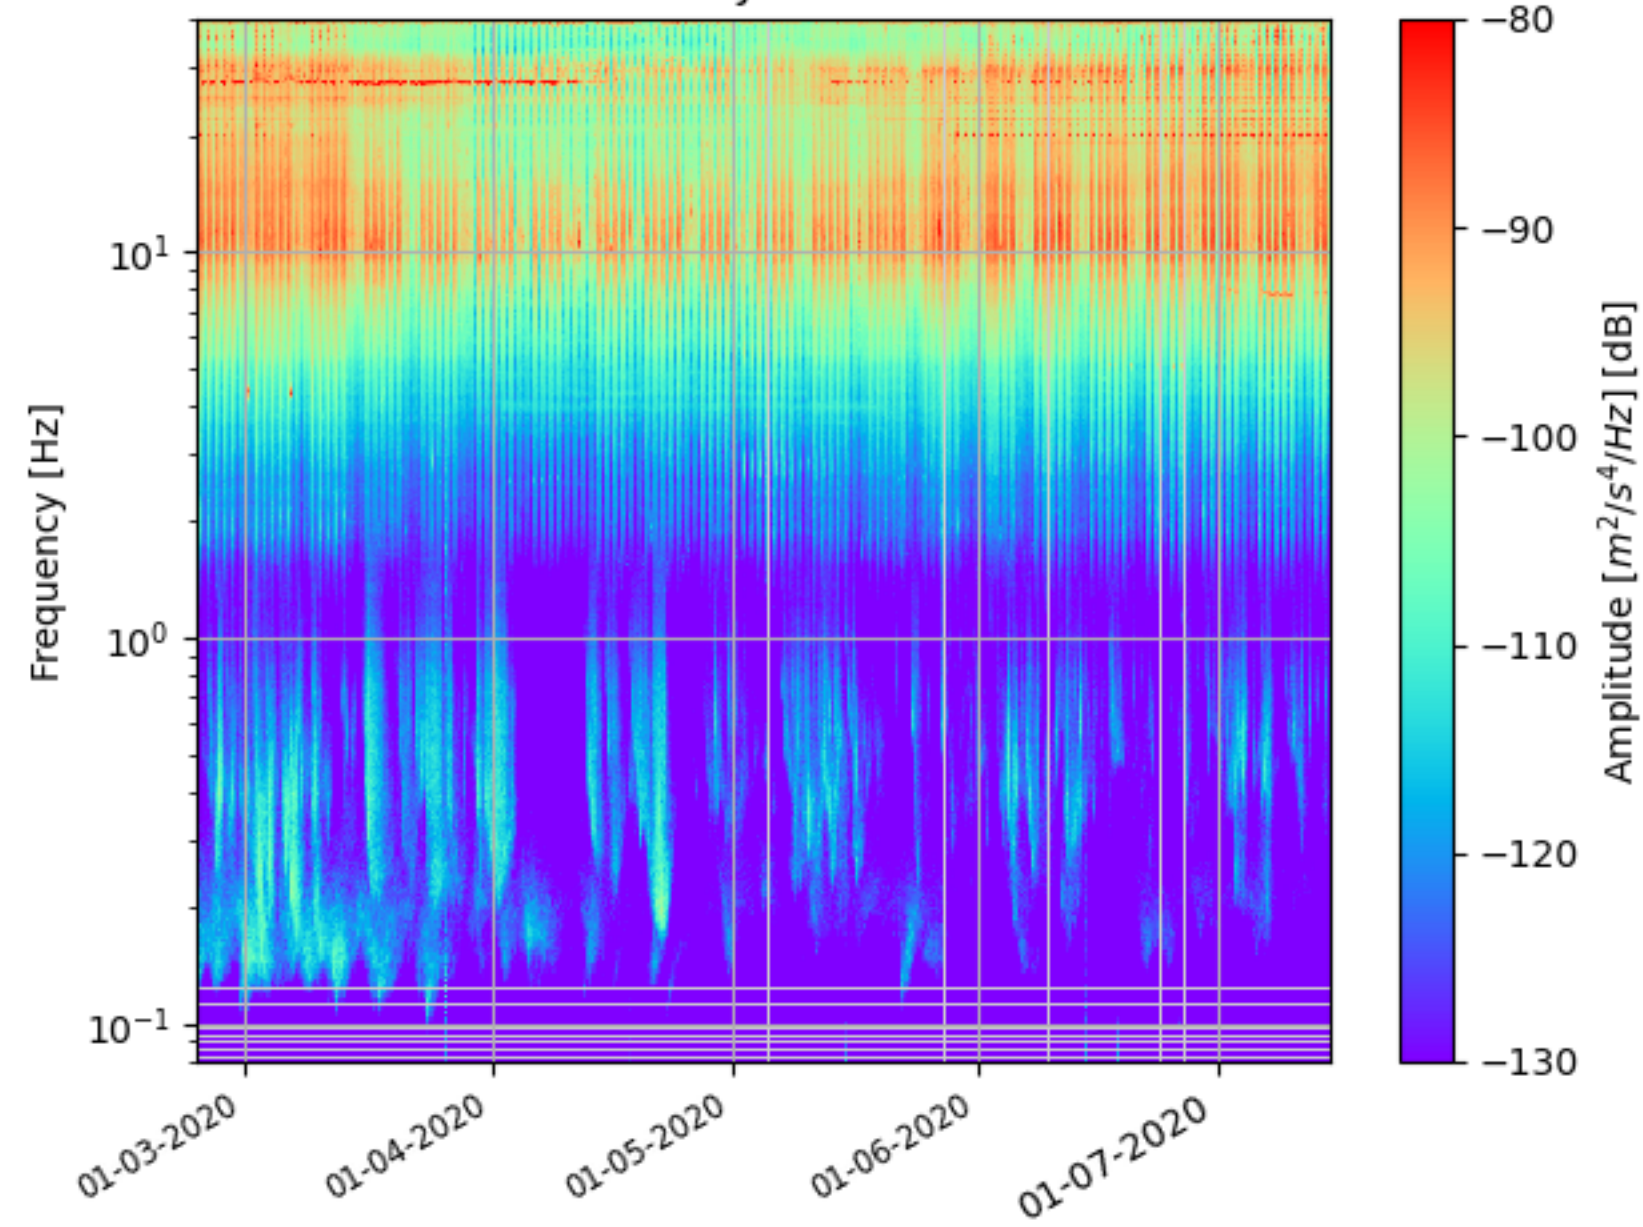



CA.MTJR..HNZ

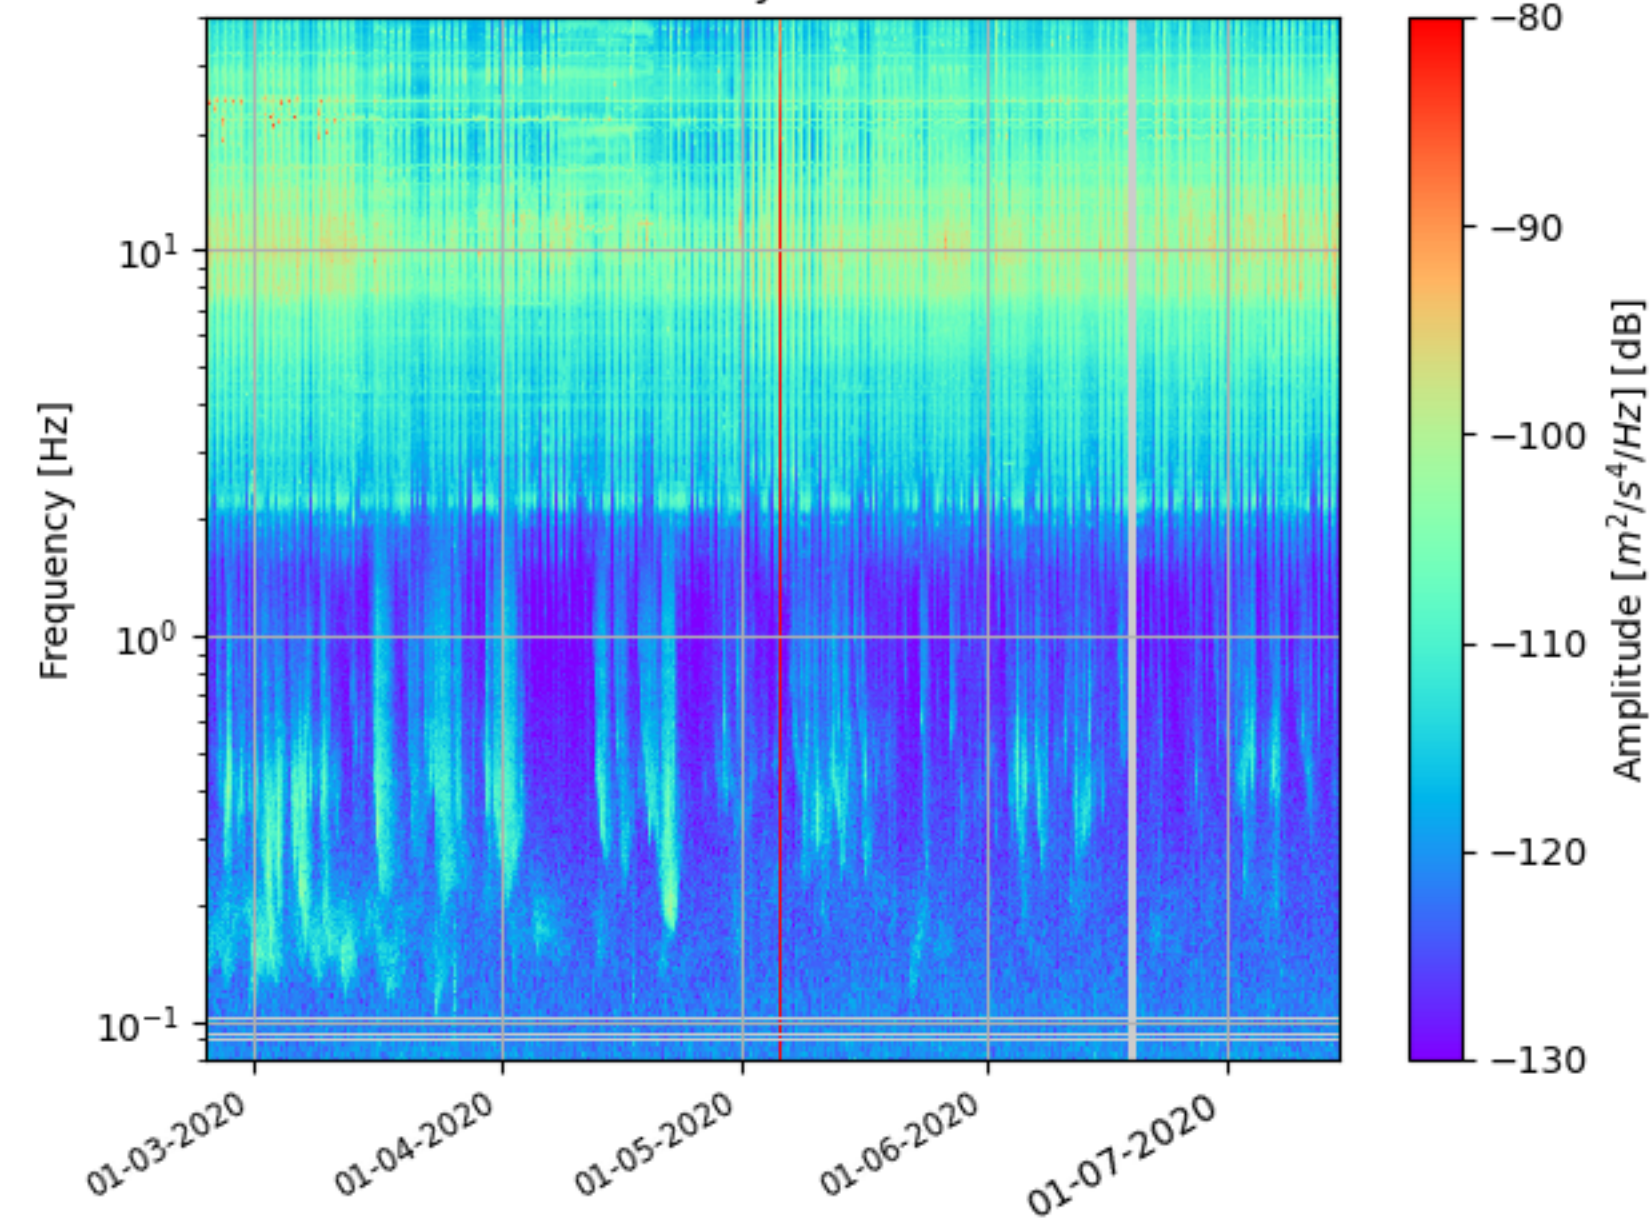

YS.BALM..EHZ

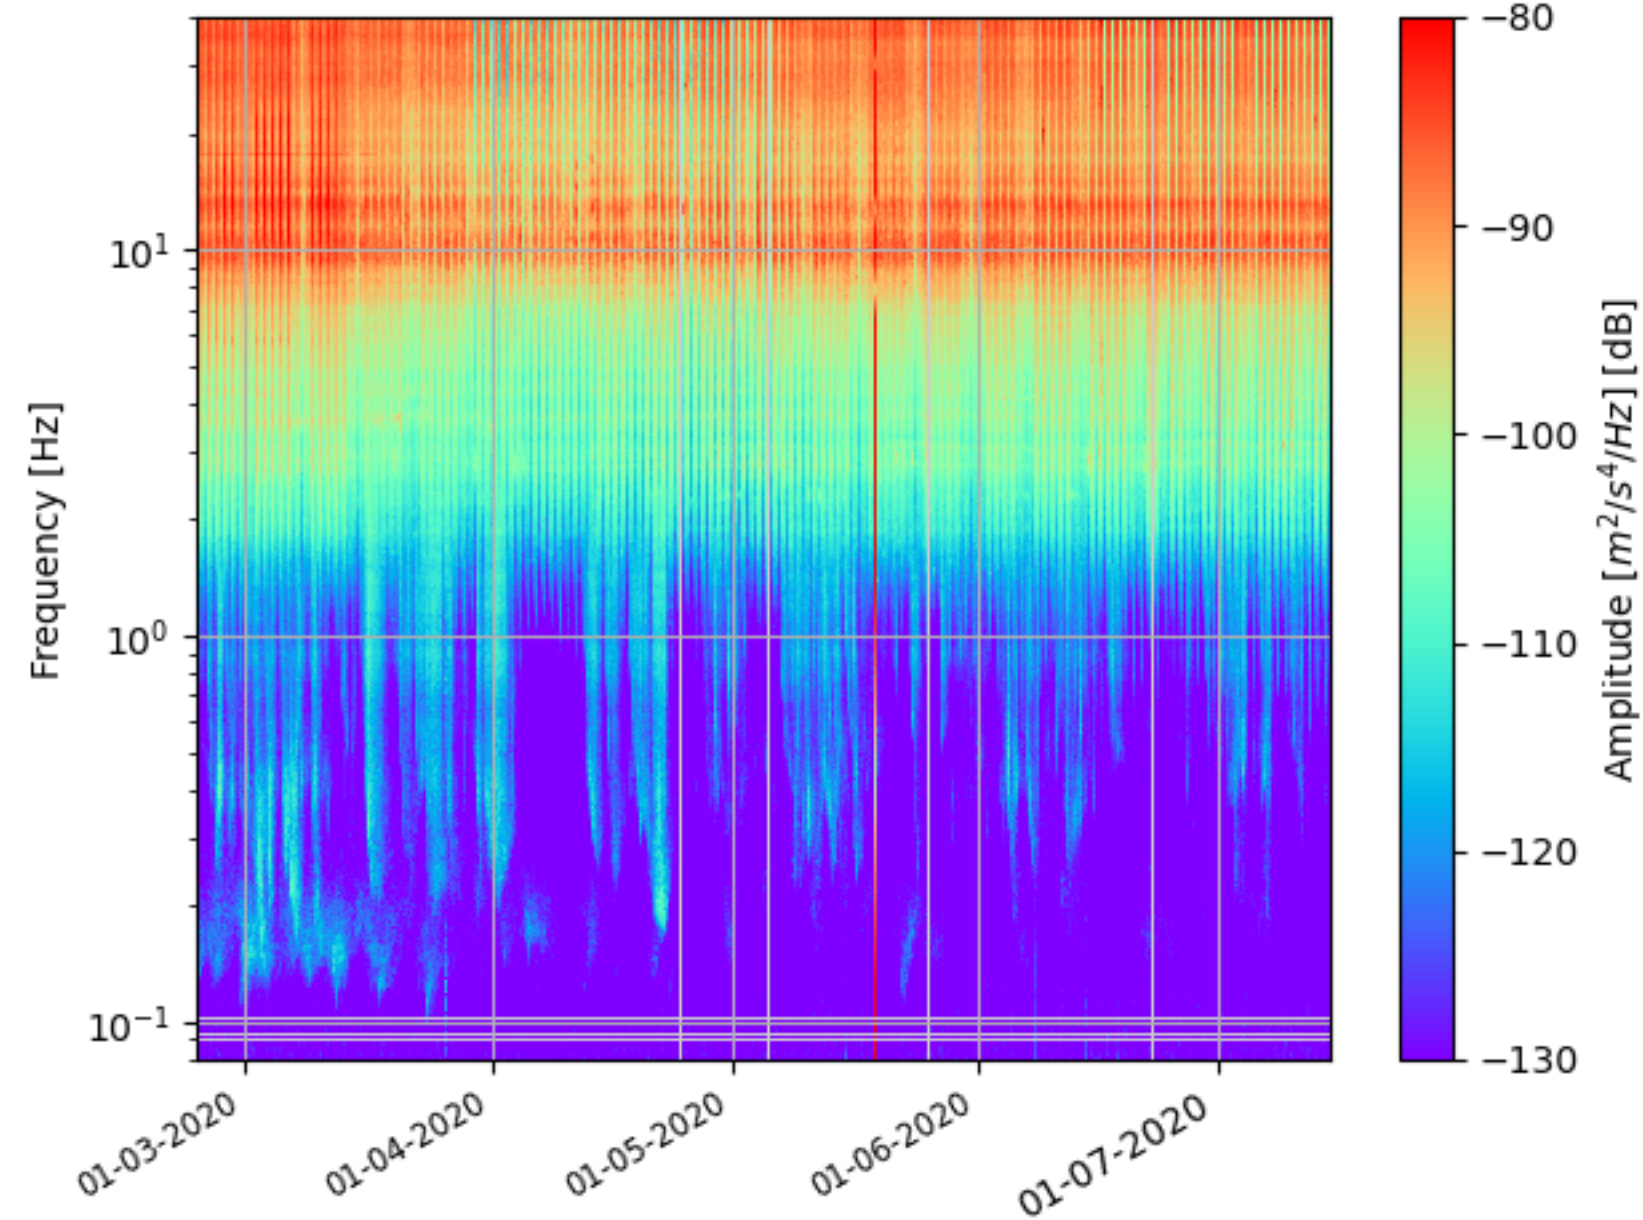

YS.CASN..EHZ

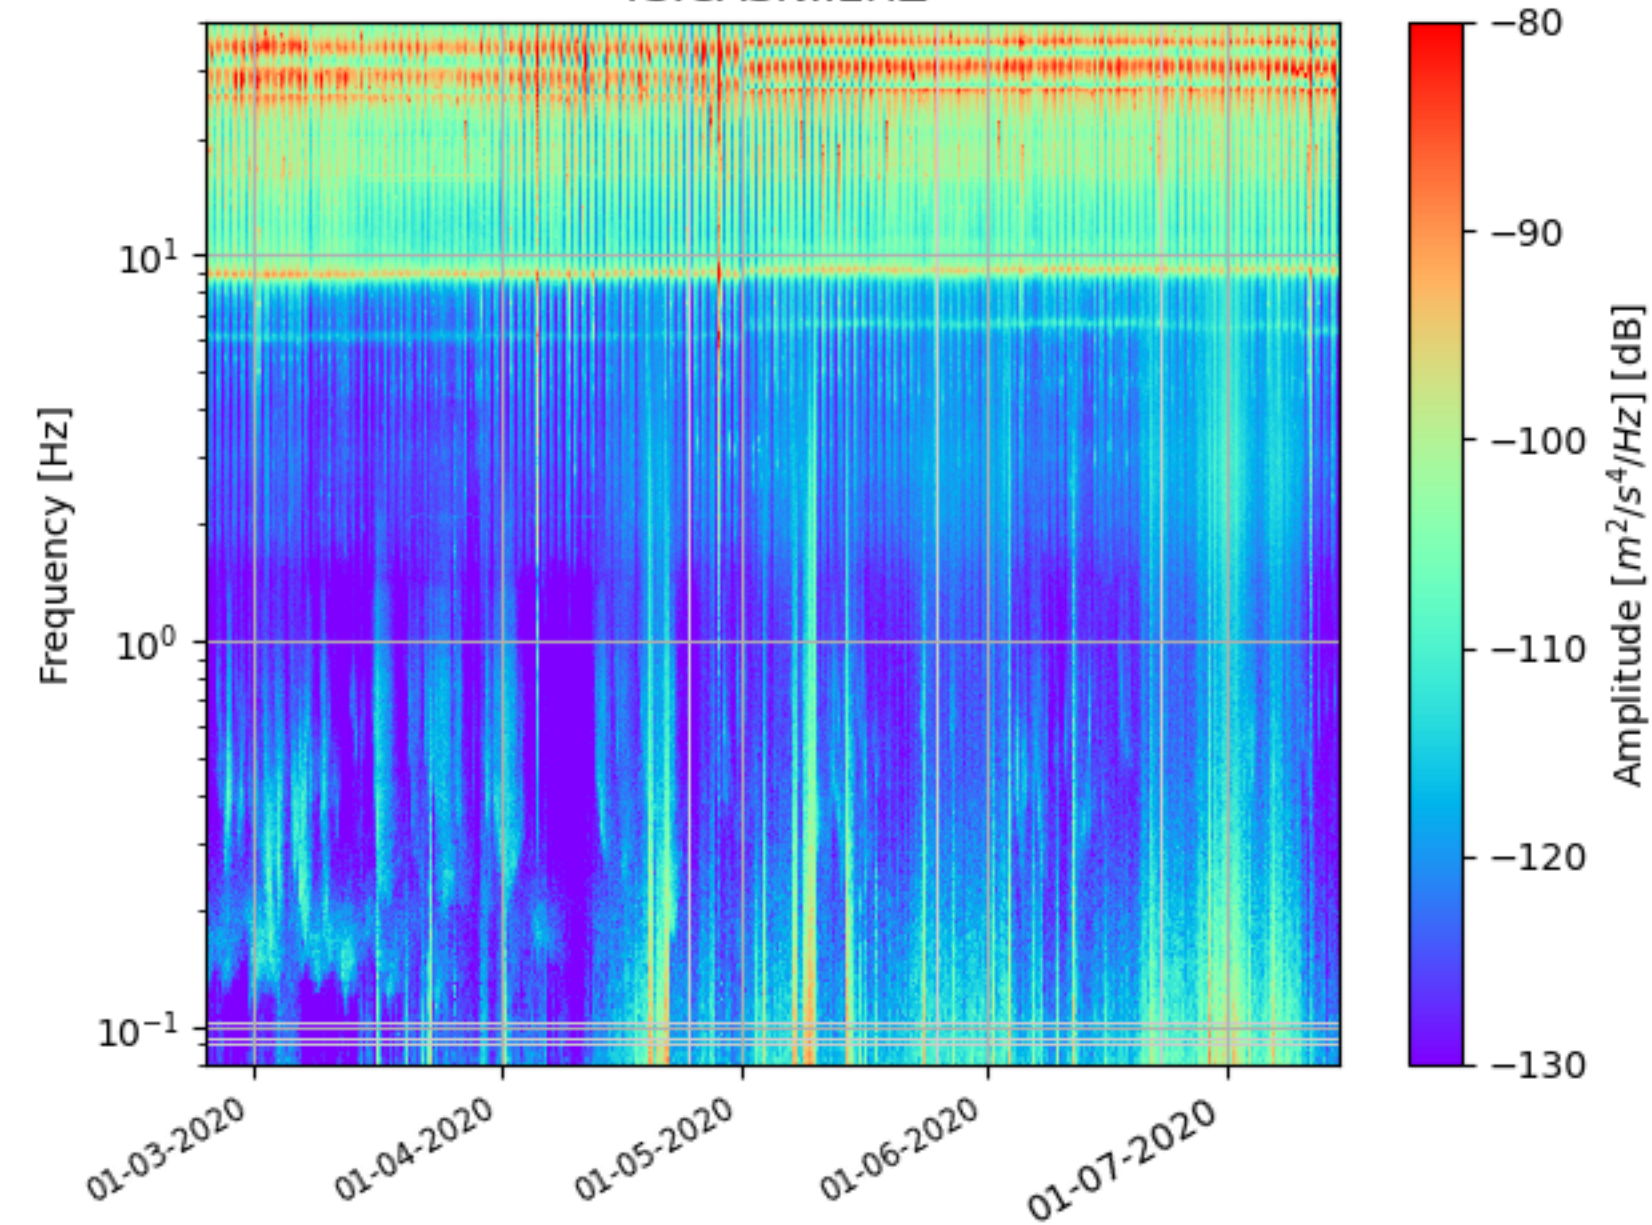

YS.ISAB..EHZ

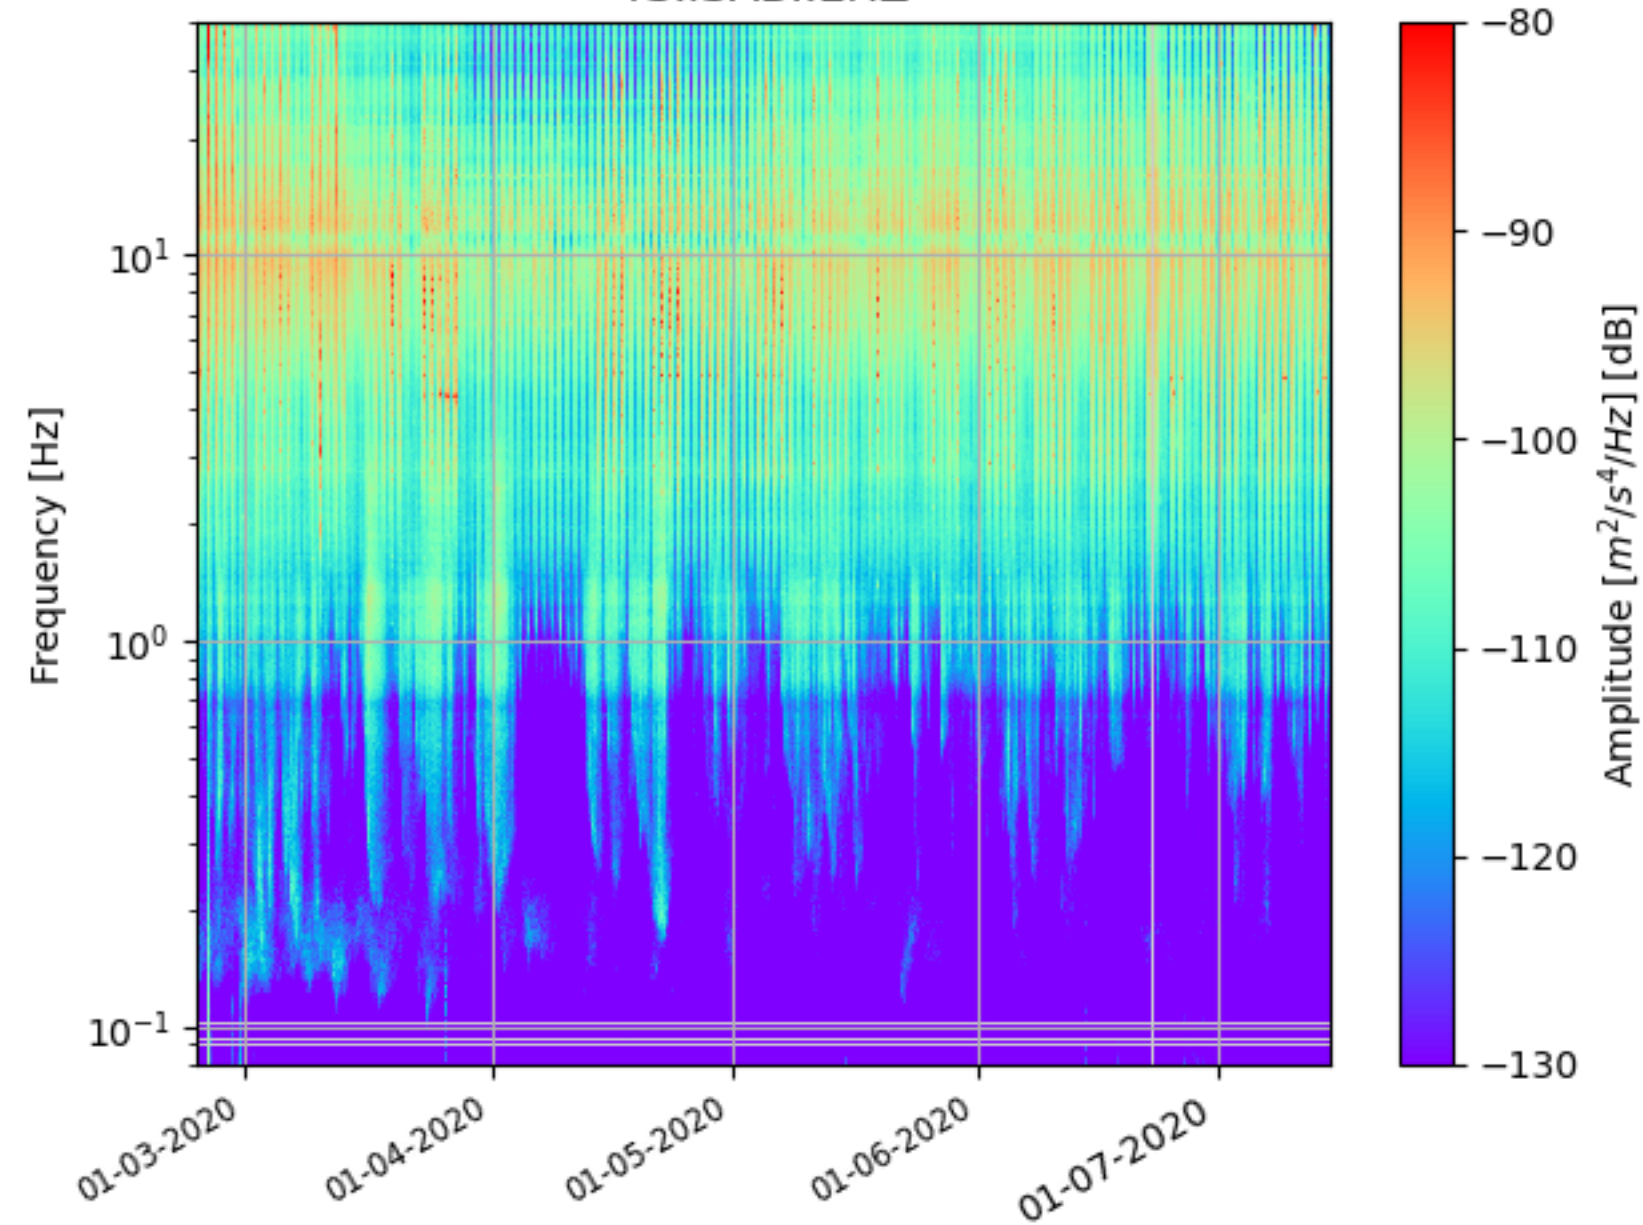



YS.JPLA..EHZ

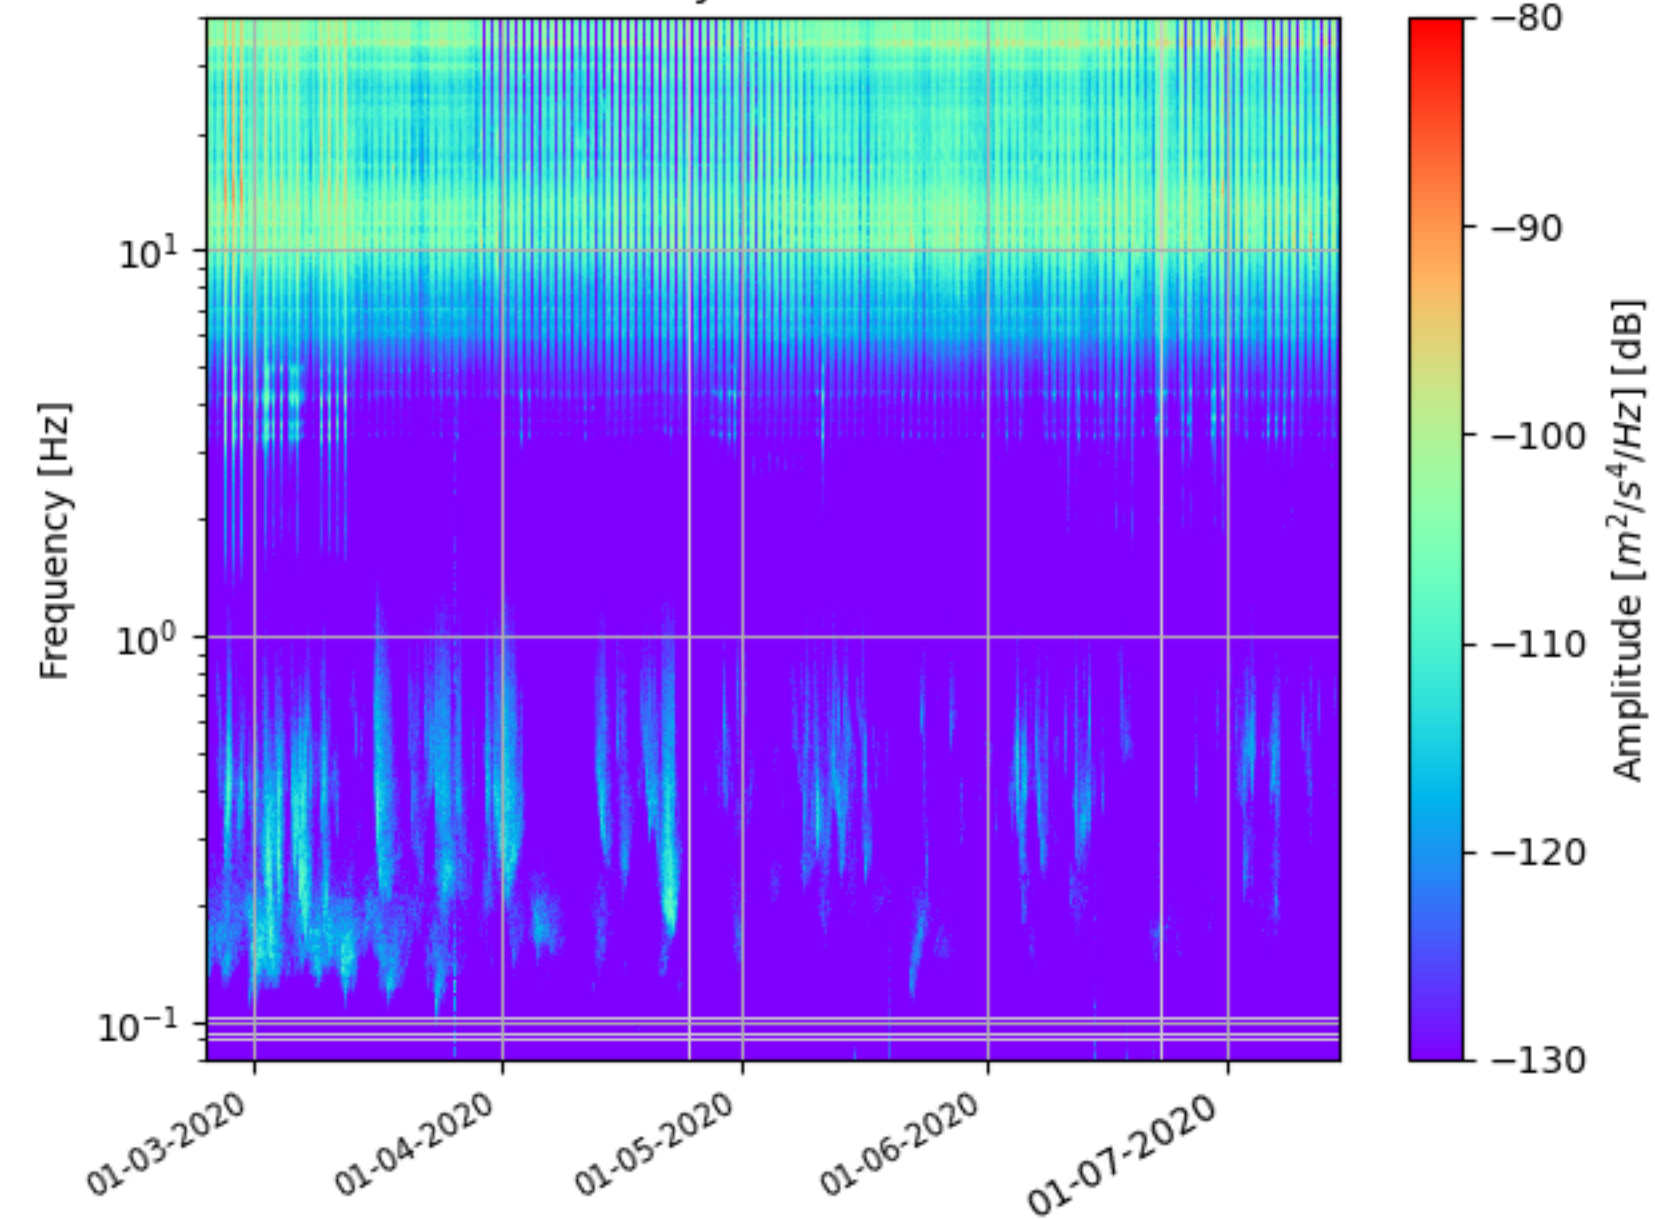

YS.MILA..EHZ

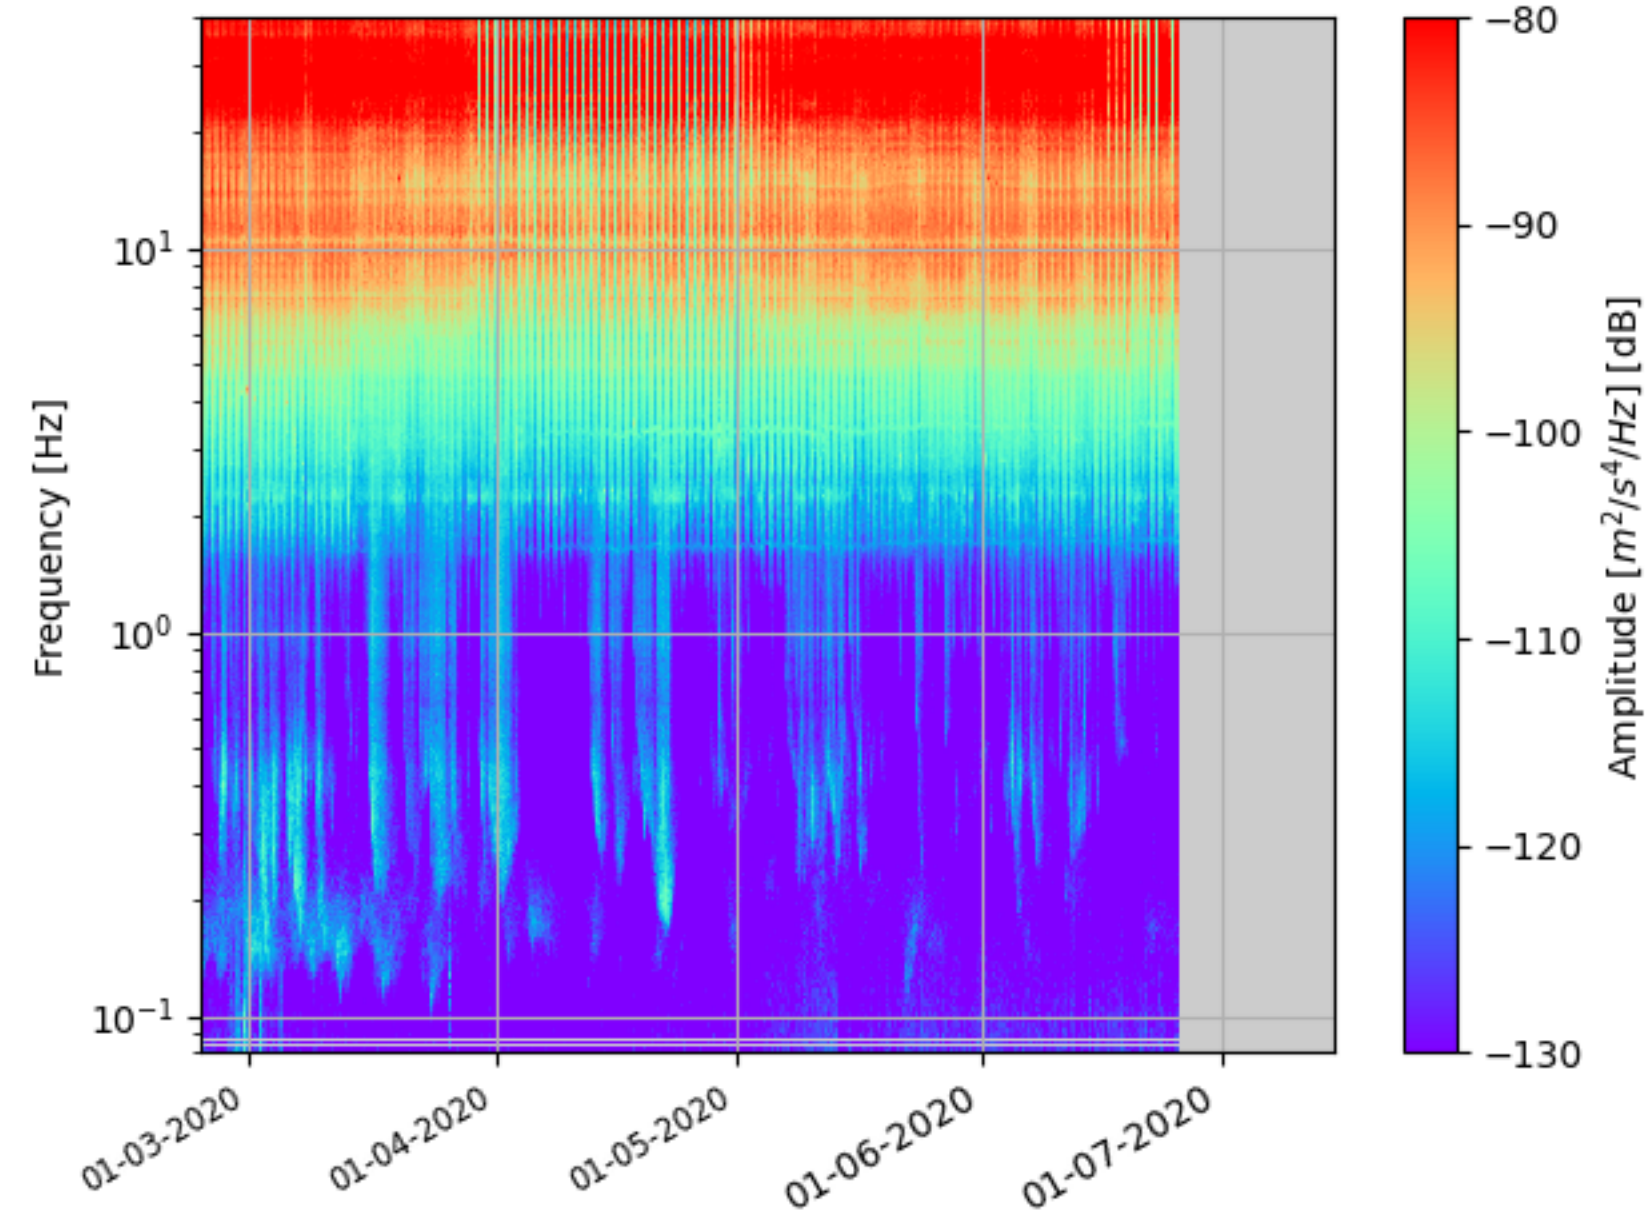

YS.PORT..EHZ

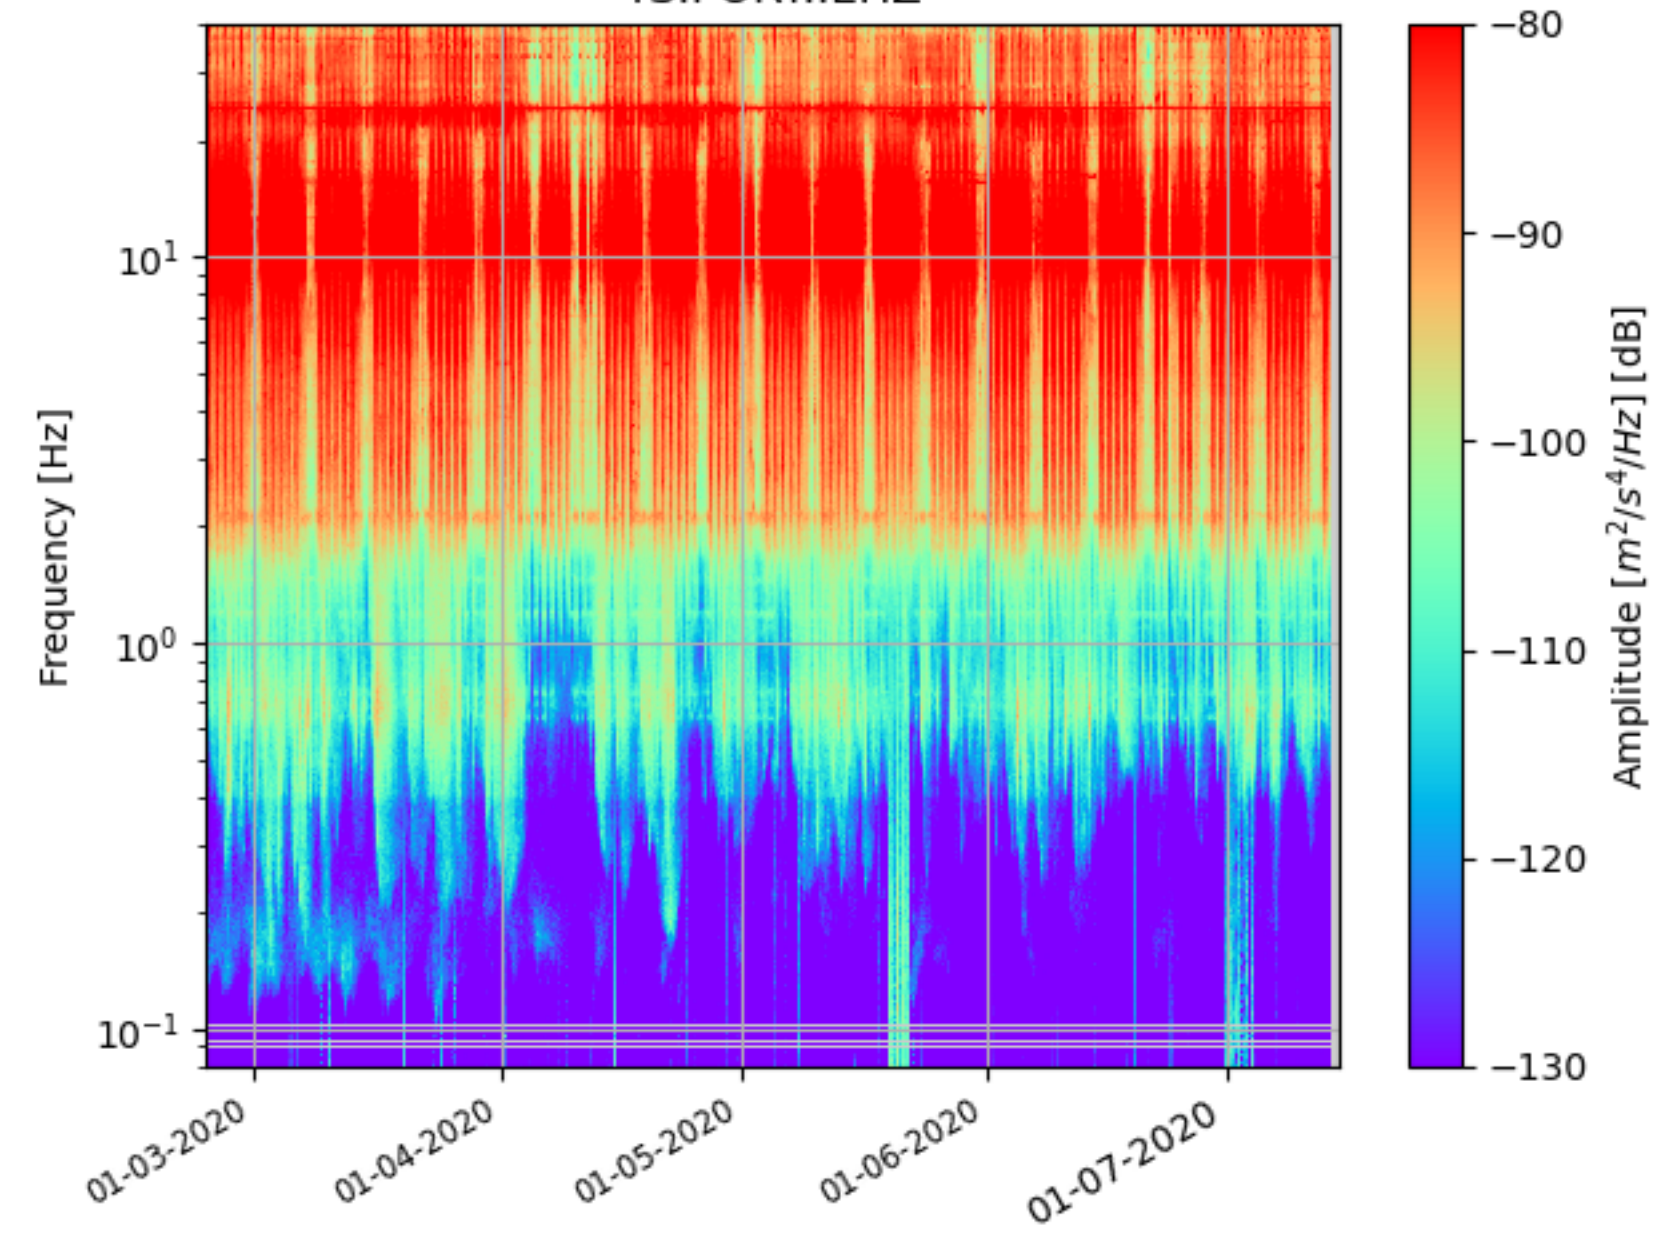

Supplement: Supplementary file 2 [file se-2020-190-supplement.zip]
