# Supplementary material for: Seismic monitoring of urban activity in Barcelona during COVID-19 lockdown
Source: Copernicus journal article supplement (doi:10.5194/se-2020-190), 2020-11-27
Supplement: Supplementary file 5 [file se-2020-190-supplement.zip]

## Supplementary Material

**Figure S1:** Spectrograms for period from February 24 to July 14, 2020 for all the available stations. Data are expressed as dB relative to  $1 \text{ m}^2/\text{s}^4/\text{Hz}$

**Figure S2:** Daily maps representing the normalized power in the 2-20 Hz band during working hours. Topographic contours are included for reference.

**Figure S3:** Variations of the PSD of the seismic acceleration in the 2-20 Hz band for all the available stations. Dark blue: daily mean value during business hours (9:00-19:00). Orange line: Weekly mean average during working hours.

**Figure S4:** Daily maps representing the real power values in the 2-20 Hz band during working hours. Topographic contours are included for reference.
